# Supplementary material
Source: Research Square preprint supplement (doi:10.21203/rs.3.rs-9357577/v1)
Supplement: Supplementary file 1 [file fd4a4a97dddb6bde99e2e920.pdf]

# Supplementary Information

Cross-validation Strategies for Medical Machine Learning:  
A Snowball Sampling Review and Open-Source Implementation

Abdelamir Karbalaie, Farhad Abtahi

## Contents

|          |                                                                                                         |           |
|----------|---------------------------------------------------------------------------------------------------------|-----------|
| <b>1</b> | <b>Supplementary Tables</b>                                                                             | <b>2</b>  |
| 1.1      | Supplementary Table S1: Complete Parameter Reference . . . . .                                          | 2         |
| 1.2      | Supplementary Table S2: Feature Comparison with Existing Tools . . . . .                                | 4         |
| 1.3      | Supplementary Table S3: Regulatory Documentation Mapping . . . . .                                      | 5         |
| 1.4      | Supplementary Table S4: Jupyter Notebook Tutorials . . . . .                                            | 6         |
| 1.5      | Supplementary Table S5: Annotated Example Scripts . . . . .                                             | 6         |
| 1.6      | Supplementary Table S6: Framework Support by trustcv Adapter Classes . . . . .                          | 7         |
| 1.7      | Supplementary Table S7: Standardized Search Labels and Naming Variants . . . . .                        | 8         |
| 1.8      | Supplementary Table S8: Leakage Detection Implementation Details . . . . .                              | 10        |
| 1.9      | Supplementary Table S9: Grouped Leakage Sensitivity Analysis Settings . . . . .                         | 11        |
| 1.10     | Supplementary Table S10: Full Grouped Leakage Sensitivity Results . . . . .                             | 12        |
| 1.11     | Supplementary Table S11: Primary leakage categories . . . . .                                           | 13        |
| 1.12     | Supplementary Table S12: Unit test . . . . .                                                            | 14        |
| <b>2</b> | <b>Supplementary Figures</b>                                                                            | <b>15</b> |
| 2.1      | Supplementary Figure S1: Method Selection Decision Flowchart . . . . .                                  | 15        |
| 2.2      | Supplementary Figure S2: Conceptual Illustrations of Cross-Validation Partitioning Strategies . . . . . | 16        |
| 2.3      | Supplementary Figure S4: <code>trustcv</code> Output Examples . . . . .                                 | 38        |
| <b>3</b> | <b>Supplementary Code</b>                                                                               | <b>39</b> |
| 3.1      | Supplementary Code S1: Basic Patient-Grouped Validation . . . . .                                       | 39        |
| 3.2      | Supplementary Code S2: Temporal Validation with Purging . . . . .                                       | 39        |
| 3.3      | Supplementary Code S3: Deep Learning with MONAI . . . . .                                               | 39        |
| 3.4      | Supplementary Code S4: Unit Test Example for K-Fold Validation . . . . .                                | 39        |
| 3.5      | Supplementary Code S5: Unit Test Example for Leakage Detection . . . . .                                | 39        |

# 1 Supplementary Tables

## 1.1 Supplementary Table S1: Complete Parameter Reference

Table 1: Complete parameter reference for all 29 cross-validation methods implemented in trustcv.

| Method                  | Parameter        | Default | Description                         |
|-------------------------|------------------|---------|-------------------------------------|
| <b>I.I.D. Methods</b>   |                  |         |                                     |
| HoldOut                 | test_size        | 0.2     | Proportion of data for test set     |
|                         | stratify         | None    | Column for stratification           |
|                         | random_state     | None    | Random seed for reproducibility     |
| KFold                   | n_splits         | 5       | Number of folds                     |
|                         | shuffle          | False   | Whether to shuffle before splitting |
|                         | random_state     | None    | Random seed                         |
| StratifiedKFold         | n_splits         | 5       | Number of folds                     |
|                         | shuffle          | False   | Whether to shuffle                  |
|                         | random_state     | None    | Random seed                         |
| RepeatedKFold           | n_splits         | 5       | Number of folds                     |
|                         | n_repeats        | 10      | Number of repetitions               |
|                         | random_state     | None    | Random seed                         |
| LOOCV                   | —                | —       | No parameters required              |
| LPOCV                   | p                | 2       | Number of samples to leave out      |
| BootstrapValidation     | n_ iterations    | 200     | Number of bootstrap iterations      |
|                         | test_size        | 0.2     | Out-of-bag proportion               |
|                         | correction       | ‘.632+’ | Bias correction method              |
|                         | random_state     | None    | Random seed                         |
| MonteCarloCV            | n_splits         | 100     | Number of random splits             |
|                         | test_size        | 0.2     | Test set proportion                 |
|                         | random_state     | None    | Random seed                         |
| NestedCV                | outer_cv         | 5       | Outer loop folds                    |
|                         | inner_cv         | 3       | Inner loop folds                    |
|                         | random_state     | None    | Random seed                         |
| <b>Grouped Methods</b>  |                  |         |                                     |
| GroupKFold              | n_splits         | 5       | Number of folds                     |
| StratifiedGroupKFold    | n_splits         | 5       | Number of folds                     |
|                         | shuffle          | False   | Whether to shuffle groups           |
|                         | random_state     | None    | Random seed                         |
| LeaveOneGroupOut        | —                | —       | No parameters required              |
| LeavePGroupsOut         | n_groups         | 2       | Number of groups to leave out       |
| RepeatedGroupKFold      | n_splits         | 5       | Number of folds                     |
|                         | n_repeats        | 10      | Number of repetitions               |
|                         | random_state     | None    | Random seed                         |
| HierarchicalGroupKFold  | n_splits         | 5       | Number of folds                     |
|                         | hierarchy_levels | None    | List of hierarchy columns           |
| GroupShafkKFold         | n_splits         | 5       | Number of folds                     |
|                         | n_repeats        | 10      | Number of repetitions               |
| NestedGroupedCV         | outer_cv         | 5       | Outer loop folds                    |
|                         | n_repeats        | 10      | Number of repetitions               |
|                         | random_state     | None    | Random seed                         |
| <b>Temporal Methods</b> |                  |         |                                     |
| TimeSeriesSplit         | n_splits         | 5       | Number of splits                    |
|                         | max_train_size   | None    | Maximum training set size           |
|                         | test_size        | None    | Fixed test set size                 |
|                         | gap              | 0       | Gap between train and test          |
| BlockedTimeSeries       | n_splits         | 5       | Number of blocks                    |

Continued on next page

Table 1 – continued from previous page

| Method                     | Parameter      | Default | Description                      |
|----------------------------|----------------|---------|----------------------------------|
|                            | gap            | 0       | Gap between blocks               |
| RollingWindowCV            | window_size    | None    | Training window size (required)  |
|                            | step_size      | 1       | Step between windows             |
|                            | test_size      | 1       | Test window size                 |
| ExpandingWindowCV          | min_train_size | None    | Minimum training size (required) |
|                            | step_size      | 1       | Step between windows             |
|                            | test_size      | 1       | Test window size                 |
| PurgedKFoldCV              | n_splits       | 5       | Number of folds                  |
|                            | purge_gap      | 0       | Samples to purge near boundaries |
| CombinatorialPurgedCV      | n_splits       | 5       | Number of folds                  |
|                            | purge_gap      | 0       | Purge period (samples)           |
|                            | embargo_gap    | 0       | Embargo period (samples)         |
| PurgedGroupTimeSeriesSplit | n_splits       | 5       | Number of splits                 |
|                            | purge_gap      | 0       | Purge period                     |
|                            | embargo_gap    | 0       | Embargo period                   |
| NestedTemporalCV           | outer_cv       | 5       | Outer loop splits                |
|                            | inner_cv       | 3       | Inner loop splits                |
|                            | purge_gap      | 0       | Purge period                     |
| <b>Spatial Methods</b>     |                |         |                                  |
| SpatialBlockCV             | n_splits       | 5       | Number of spatial blocks         |
|                            | block_size     | None    | Block dimensions (auto if None)  |
|                            | buffer         | 0       | Buffer distance                  |
| BufferedSpatialCV          | n_splits       | 5       | Number of blocks                 |
|                            | buffer_radius  | None    | Buffer radius (required)         |
| SpatiotemporalBlockCV      | n_spatial      | 5       | Spatial blocks                   |
|                            | n_temporal     | 5       | Temporal blocks                  |
|                            | buffer         | 0       | Spatial buffer                   |
|                            | gap            | 0       | Temporal gap                     |
| EnvironmentalHealthCV      | n_splits       | 5       | Number of folds                  |
|                            | exposure_col   | None    | Exposure variable column         |
|                            | buffer_radius  | None    | Buffer around exposure sources   |

## 1.2 Supplementary Table S2: Feature Comparison with Existing Tools

The following comparison shows which of the 29 methods identified by the snowball sampling review are implemented in each tool. trustcv implements all 29 methods identified; other tools implement subsets. Counts in the category rows reflect the review taxonomy; scikit-learn’s total of 15 includes PredefinedSplit, a utility splitter counted separately.

Table 2: Feature comparison between trustcv and existing cross-validation tools. Method counts reflect the review taxonomy; see Methods for inclusion criteria.

| Feature                                               | trustcv   | scikit-learn          | mlr3        | tidymodels  | MLme     |
|-------------------------------------------------------|-----------|-----------------------|-------------|-------------|----------|
| <i>Cross-validation methods (review taxonomy)</i>     |           |                       |             |             |          |
| I.I.D. methods                                        | 9         | 8                     | 6           | 5           | 3        |
| Grouped methods                                       | 8         | 5                     | 3           | 2           | 0        |
| Temporal methods                                      | 8         | 1                     | 2           | 2           | 0        |
| Spatial methods                                       | 4         | 0                     | 4           | 3           | 0        |
| <b>Total (review-identified)</b>                      | <b>29</b> | <b>14<sup>a</sup></b> | <b>15</b>   | <b>12</b>   | <b>3</b> |
| <i>Safety features</i>                                |           |                       |             |             |          |
| Patient leakage detection                             | ✓         | —                     | —           | —           | —        |
| Temporal leakage detection                            | ✓         | —                     | —           | —           | —        |
| Spatial leakage detection                             | ✓         | —                     | Visual only | Visual only | —        |
| Preprocessing leakage detection                       | ✓         | —                     | —           | —           | —        |
| Duplicate detection                                   | ✓         | —                     | —           | —           | —        |
| Algorithmic independence verification                 | ✓         | —                     | —           | —           | —        |
| <i>Framework support</i>                              |           |                       |             |             |          |
| scikit-learn                                          | ✓         | ✓                     | —           | —           | ✓        |
| PyTorch                                               | ✓         | —                     | —           | —           | —        |
| TensorFlow/Keras                                      | ✓         | —                     | —           | —           | —        |
| MONAI                                                 | ✓         | —                     | —           | —           | —        |
| JAX                                                   | ✓         | —                     | —           | —           | —        |
| <i>Regulatory documentation</i>                       |           |                       |             |             |          |
| FDA GMLP templates                                    | ✓         | —                     | —           | —           | —        |
| CE MDR templates                                      | ✓         | —                     | —           | —           | —        |
| TRIPOD+AI mapping                                     | ✓         | —                     | —           | —           | —        |
| <i>Other</i>                                          |           |                       |             |             |          |
| Primary language                                      | Python    | Python                | R           | R           | Python   |
| Clinical metrics (sensitivity, specificity, PPV, NPV) | ✓         | Limited               | Limited     | Limited     | ✓        |
| Confidence intervals for metrics                      | ✓         | —                     | ✓           | ✓           | —        |
| Educational tutorials                                 | ✓         | Limited               | ✓           | ✓           | Limited  |
| Method selection guides                               | ✓         | —                     | —           | —           | —        |

<sup>a</sup>Excludes PredefinedSplit, a utility splitter for user-defined partitions not counted in the category-based rows above.

### 1.3 Supplementary Table S3: Regulatory Documentation Mapping

Table 3: Mapping of trustcv outputs to regulatory framework requirements. trustcv provides documentation templates and structured outputs that can support regulatory submissions; regulatory compliance depends on the complete device lifecycle.

| <b>Framework</b>                                   | <b>Requirement</b>                                                            | <b>trustcv Output</b>                                             |
|----------------------------------------------------|-------------------------------------------------------------------------------|-------------------------------------------------------------------|
| <i>FDA Good Machine Learning Practice (GMLP)</i>   |                                                                               |                                                                   |
| Principle 4                                        | Training data sets are independent of test sets                               | Leakage detection report; split verification                      |
| Principle 5                                        | Reference datasets are based upon best available methods                      | Method selection documentation                                    |
| Principle 8                                        | Testing demonstrates device performance during clinically relevant conditions | Performance metrics with confidence intervals; stratified results |
| Principle 9                                        | Users are provided clear, essential information                               | Validation summary report                                         |
| <i>CE Medical Device Regulation (MDR) 2017/745</i> |                                                                               |                                                                   |
| Annex II, Section 6.1                              | Clinical evaluation plan                                                      | Validation methodology documentation                              |
| Annex II, Section 6.2                              | Device description and specification                                          | Software version; dependency list                                 |
| Annex XIV, Part A                                  | Clinical evaluation documentation                                             | Performance metrics; confidence intervals                         |
| <i>TRIPOD+AI Statement</i>                         |                                                                               |                                                                   |
| Item 6a                                            | Eligibility criteria for participants                                         | Data filtering documentation                                      |
| Item 10a                                           | How sample size was determined                                                | Sample size per fold report                                       |
| Item 10b                                           | How data were split                                                           | Split methodology; fold assignments                               |
| Item 13a                                           | Model development procedure                                                   | CV method selection rationale                                     |
| Item 15                                            | Performance measures with confidence intervals                                | Bootstrap CI; DeLong CI for AUC                                   |
| Item 16                                            | Model performance results                                                     | Per-fold and aggregated metrics                                   |

## 1.4 Supplementary Table S4: Jupyter Notebook Tutorials

Table 4: Interactive Jupyter notebooks included with trustcv, providing hands-on tutorials for each method category.

| No. | Notebook                                   | Description                                                                                                                                                              |
|-----|--------------------------------------------|--------------------------------------------------------------------------------------------------------------------------------------------------------------------------|
| 1   | 01_IID_Methods_Showcase.ipynb              | Introduction to i.i.d. cross-validation methods; comparison of KFold, StratifiedKFold, and BootstrapValidation on synthetic data with visualizations of fold assignments |
| 2   | 02_Advanced_Workflow_UniversalRunner.ipynb | Advanced workflows using the UniversalRunner class; framework-agnostic validation pipelines; callback configuration and metric customization                             |
| 3   | 03_TrustCVValidator_Showcase.ipynb         | Comprehensive demonstration of the TrustCVValidator class; leakage detection workflow and regulatory report generation                                                   |
| 4   | 04_TrustCVValidator_IID_Comparison.ipynb   | Systematic comparison of i.i.d. methods; variance analysis across repeated splits; method selection guidance for tabular clinical data                                   |
| 5   | 05_CrossValidation_Comparison.ipynb        | Side-by-side comparison of standard vs. grouped vs. temporal CV; visualization of performance inflation under different data structures                                  |

## 1.5 Supplementary Table S5: Annotated Example Scripts

Table 5: Annotated example scripts demonstrating trustcv across clinical scenarios.

| No. | Script                          | Description                                                                                                                           |
|-----|---------------------------------|---------------------------------------------------------------------------------------------------------------------------------------|
| 1   | heart_disease_prediction.py     | Basic i.i.d. cross-validation on tabular clinical data; demonstrates KFold, StratifiedKFold, and performance comparison               |
| 2   | heart_disease_classification.py | Extended methodology comparison including grouped methods for handling multiple observations per patient                              |
| 3   | icupatient_monitoring.py        | Temporal cross-validation for ICU time-series data; demonstrates TimeSeriesSplit and PurgedKFoldCV with rationale                     |
| 4   | multisite_clinical_trial.py     | Grouped and hierarchical validation for multi-centre studies; site-level and patient-level grouping; ICC estimation                   |
| 5   | disease_spread_modeling.py      | Spatial and spatiotemporal validation for epidemiological data; demonstrates SpatialBlockCV with geographic visualization             |
| 6   | monai_3d_imaging_cv.py          | Deep learning integration with MONAI for 3D medical image segmentation; GPU memory management; grouped CV for scan-level independence |
| 7   | tensorflow_medical_cv.py        | TensorFlow/Keras integration; model cloning and callback preservation across folds                                                    |

## 1.6 Supplementary Table S6: Framework Support by trustcv Adapter Classes

Table 6: Framework support provided by trustcv adapter classes.

| Framework            | Adapter Class   | Integration Features                                                     |
|----------------------|-----------------|--------------------------------------------------------------------------|
| scikit-learn         | SklearnCVRunner | Native compatibility; drop-in replacement for cross_val_score            |
| PyTorch              | TorchCVRunner   | Automatic GPU memory management; compatible with standard training loops |
| TensorFlow<br>/Keras | KerasCVRunner   | Model cloning, callback preservation                                     |
| MONAI                | MonaiCVRunner   | 3D medical imaging transforms, sliding window inference                  |
| JAX                  | JaxCVRunner     | Functional API support, JIT compilation compatibility                    |

*Acronyms:* GPU = graphics processing unit; JIT = just-in-time; MONAI = Medical Open Network for AI.

## 1.7 Supplementary Table S7: Standardized Search Labels and Naming Variants

Table 7: Standardized search labels and naming variants used for literature retrieval and screening. Naming variants were treated as synonymous search expressions during literature retrieval and normalization of method concepts across fields. Canonical method names correspond to the TrustCV implementation and final review taxonomy.

| TrustCV method          | Standardized search label                   | Naming variants used for search                                                                                                                                                                            |
|-------------------------|---------------------------------------------|------------------------------------------------------------------------------------------------------------------------------------------------------------------------------------------------------------|
| <b>I.I.D. methods</b>   |                                             |                                                                                                                                                                                                            |
| HoldOut                 | Holdout validation                          | holdout validation; hold-out validation; holdout; train-test split; train/test split; single split; split-sample validation; one-time holdout; simple holdout; simple split                                |
| KFold                   | K-fold cross-validation                     | k-fold cross-validation; k fold cross validation; k-fold CV; 10-fold cross-validation; 10-fold CV; ten-fold cross-validation; v-fold cross-validation; v-fold CV                                           |
| StratifiedKFold         | Stratified K-fold cross-validation          | stratified k-fold; stratified k-fold cross-validation; stratified cross-validation; stratified CV; stratified folds; balanced folds                                                                        |
| RepeatedKFold           | Repeated K-fold cross-validation            | repeated k-fold; repeated k-fold cross-validation; repeated cross-validation; repeated CV; repeated 10-fold; iterated k-fold                                                                               |
| LOOCV                   | Leave-one-out cross-validation              | leave-one-out cross-validation; leave-one-out; LOOCV; LOO-CV; jackknife cross-validation; jackknife CV; n-fold cross-validation; n-fold CV                                                                 |
| LPOCV                   | Leave-pair-out cross-validation             | leave-pair-out cross-validation; leave-pair-out; LPOCV; leave-p-out cross-validation; leave-p-out; tournament leave-pair-out                                                                               |
| BootstrapValidation     | Bootstrap validation                        | bootstrap validation; bootstrap internal validation; bootstrap resampling; bootstrap cross-validation; .632 bootstrap; .632+ bootstrap; .632+ method                                                       |
| MonteCarloCV            | Monte Carlo cross-validation                | Monte Carlo cross-validation; Monte Carlo CV; repeated hold-out; repeated hold-out; random subsampling validation; random subsampling CV; shuffle split; shuffle-split; random split validation            |
| NestedCV                | Nested cross-validation                     | nested cross-validation; nested CV; double cross-validation; double CV; nested k-fold; two-loop CV; inner loop outer loop CV                                                                               |
| <b>Grouped methods</b>  |                                             |                                                                                                                                                                                                            |
| GroupKFold              | Group K-fold cross-validation               | group k-fold; group k-fold cross-validation; grouped k-fold; grouped cross-validation; patient-level CV; patient-wise CV; subject-wise CV; subject-independent cross-validation                            |
| StratifiedGroupKFold    | Stratified Group K-fold cross-validation    | stratified group k-fold; stratified group k-fold cross-validation; stratified grouped CV; group-stratified cross-validation; group stratification                                                          |
| LeaveOneGroupOut        | Leave-one-group-out cross-validation        | leave-one-group-out; leave-one-group-out cross-validation; LOGO; leave-one-subject-out; LOSO; leave-one-site-out; leave-site-out; leave-one-patient-out; cross-subject CV                                  |
| LeavePGroupsOut         | Leave-p-groups-out cross-validation         | leave-p-groups-out; leave-p-groups-out cross-validation; leave-multiple-groups-out; leave-multiple-sites-out                                                                                               |
| RepeatedGroupKFold      | Repeated Group K-fold cross-validation      | repeated group k-fold; repeated group k-fold cross-validation; repeated grouped CV; repeated group CV                                                                                                      |
| HierarchicalGroupKFold  | Hierarchical grouped cross-validation       | hierarchical cross-validation; hierarchical grouped cross-validation; multi-level hierarchical CV; nested-group cross-validation; cluster-aware hierarchical CV                                            |
| GroupShuffleSplit       | Group shuffle split cross-validation        | group shuffle split; group shuffle-split; random group split; grouped shuffle split; cluster shuffle split                                                                                                 |
| NestedGroupedCV         | Nested grouped cross-validation             | nested grouped cross-validation; nested grouped CV; nested group k-fold; nested group CV; subject-aware nested CV; group-constrained nested CV                                                             |
| <b>Temporal methods</b> |                                             |                                                                                                                                                                                                            |
| TimeSeriesSplit         | Time-series split / walk-forward validation | time series split; time-series split; time series cross-validation; temporal cross-validation; walk-forward validation; walk forward validation; forward chaining; forward chaining CV; forward validation |
| BlockedTimeSeries       | Blocked time-series cross-validation        | blocked time series; blocked time-series CV; blocked CV; temporal block CV; block CV; non-overlapping blocks; hv-block cross-validation                                                                    |

Continued on next page

| <b>TrustCV method</b>      | <b>Standardized search label</b>      | <b>Naming variants used for search</b>                                                                                                                                                                                                |
|----------------------------|---------------------------------------|---------------------------------------------------------------------------------------------------------------------------------------------------------------------------------------------------------------------------------------|
| RollingWindowCV            | Rolling-window cross-validation       | rolling window cross-validation; rolling-window cross-validation; rolling CV; rolling origin; rolling-origin evaluation; rolling-origin cross-validation; sliding window validation; moving window validation; time-series rolling CV |
| ExpandingWindowCV          | Expanding-window cross-validation     | expanding window cross-validation; expanding-window CV; expanding window; growing window validation; cumulative training window; recursive CV; expanding training window                                                              |
| PurgedKFoldCV              | Purged K-fold cross-validation        | purged k-fold; purged k-fold cross-validation; purged cross-validation; purging with embargo; embargoed cross-validation                                                                                                              |
| CombinatorialPurgedCV      | Combinatorial purged cross-validation | combinatorial purged CV; combinatorial purged cross-validation; CPCV; combinatorial CV with embargo                                                                                                                                   |
| PurgedGroupTimeSeriesSplit | Purged group time-series split        | PurgedGroupTimeSeriesSplit; purged group time series; purged group time-series split; group-aware temporal cross-validation; grouped temporal purged CV                                                                               |
| NestedTemporalCV           | Nested temporal cross-validation      | nested temporal cross-validation; nested temporal CV; nested time series CV; nested time-series CV; nested time series; temporal nested CV; double cross-validation for time series                                                   |
| <b>Spatial methods</b>     |                                       |                                                                                                                                                                                                                                       |
| SpatialBlockCV             | Spatial block cross-validation        | spatial block cross-validation; spatial block CV; spatial CV; spatial cross-validation; spatial blocking; blockCV                                                                                                                     |
| BufferedSpatialCV          | Buffered spatial cross-validation     | buffered spatial CV; buffered spatial cross-validation; buffered leave-one-out; buffered leave one out; B-LOO CV; spatial buffer cross-validation; buffer zone validation                                                             |
| SpatiotemporalBlockCV      | Spatiotemporal block cross-validation | spatiotemporal block cross-validation; spatiotemporal block CV; spatiotemporal CV; spatial-temporal blocked CV; ST-blocked CV                                                                                                         |
| EnvironmentalHealthCV      | Environmental health cross-validation | environmental CV; environmental spatial CV; environmental health cross-validation; exposure-model cross-validation; exposure model validation                                                                                         |

## 1.8 Supplementary Table S8: Leakage Detection Implementation Details

Table 8: Code-grounded implementation details of leakage detection in `DataLeakageChecker`.

| Main-paper category / auxiliary diagnostic | trustcv implementation                                                                                              | Activation mode                                        | Core logic                                                                                                                                                                    | Reporting behavior                                                                                               |
|--------------------------------------------|---------------------------------------------------------------------------------------------------------------------|--------------------------------------------------------|-------------------------------------------------------------------------------------------------------------------------------------------------------------------------------|------------------------------------------------------------------------------------------------------------------|
| Patient/group leakage                      | Internal patient/group overlap check within <code>check_cv_splits()</code>                                          | Default fold-wise                                      | Intersects train and test group identifiers; any overlap is flagged                                                                                                           | Included in <code>LeakageReport</code> ; severity escalates to <b>critical</b>                                   |
| Temporal leakage                           | Internal temporal leakage check within <code>check_cv_splits()</code>                                               | Default fold-wise                                      | Flags when test data precede training start or when substantial test-time overlap occurs within the training period                                                           | Included in <code>LeakageReport</code> ; typically <b>high</b> severity                                          |
| Spatial leakage                            | <code>spatial_check()</code> called from <code>check_cv_splits()</code> when coordinates are available              | Default fold-wise when coordinates are provided        | Computes minimum train-test distances; flags excessive proximity using a user-defined or auto-derived threshold                                                               | Included in <code>LeakageReport</code> ; <b>low</b> or <b>medium</b> severity depending on proximity fraction    |
| Preprocessing leakage                      | Feature-statistics comparison inside <code>check_cv_splits()</code> plus <code>check_preprocessing_leakage()</code> | Default suspicion check + explicit callable diagnostic | Screens suspiciously similar train/test means and standard deviations; explicit helper tests whether preprocessing appears to use global rather than training-only statistics | Default scan adds warning/report entry; explicit helper returns a preprocessing-leakage flag                     |
| Duplicate leakage                          | Internal duplicate check within <code>check_cv_splits()</code>                                                      | Default fold-wise                                      | Uses row hashing to identify exact train/test duplicates                                                                                                                      | Included in <code>LeakageReport</code> ; typically <b>high</b> severity                                          |
| Near-duplicate contamination               | <code>check_near_duplicates()</code>                                                                                | Default fold-wise                                      | Uses cosine similarity after train-based normalization to detect highly similar train/test samples                                                                            | Added to <code>LeakageReport</code> as auxiliary duplicate-related contamination; typically <b>high</b> severity |
| Feature-target leakage                     | <code>check_feature_target_leakage()</code> and <code>comprehensive_check()</code>                                  | Extended callable diagnostic                           | Flags suspiciously strong Pearson correlation or mutual information between individual features and the target                                                                | Returned in the comprehensive report; not the main default fold-wise check                                       |
| Hierarchical leakage                       | <code>check_hierarchical_leakage()</code>                                                                           | Extended callable diagnostic                           | Detects overlap in parent groups (e.g., hospital) even when child groups (e.g., patients) are separated                                                                       | Returns structured diagnostic output for manual or programmatic use                                              |
| Label-distribution drift                   | Internal label-distribution diagnostic within <code>check_cv_splits()</code>                                        | Default auxiliary diagnostic                           | Compares class prevalence between train and test folds; warns when strong imbalance is induced by splitting                                                                   | Recorded in report details as a split-quality warning rather than a strict leakage type                          |
| Fold-level aggregation                     | <code>LeakageDetectionCallback</code> / validator integration                                                       | Automatic when enabled                                 | Aggregates fold reports across a CV run                                                                                                                                       | Summarizes number of affected folds, worst severity, and encountered leakage types                               |

*Note.* The present table (S8) distinguishes the six canonical leakage categories emphasised in the main paper from auxiliary diagnostics implemented in the library. In particular, feature-target leakage, hierarchical leakage, and explicit preprocessing leakage are exposed through callable diagnostics, while label-distribution drift is treated as a split-quality diagnostic rather than a strict leakage type.

## 1.9 Supplementary Table S9: Grouped Leakage Sensitivity Analysis Settings

Table 9: Fixed and scenario-specific settings used for the grouped leakage sensitivity analysis supporting Table 6. The synthetic study used a repeated-measures design with patient-level structure and compared low-, medium-, and high-leakage settings by varying global and patient-specific signal strength, fingerprint dimensionality, and noise parameters. Nested Grouped CV used an outer 10-fold Group K-Fold loop and an inner 5-fold Group K-Fold loop with `GridSearchCV` to tune `randomforestclassifier__max_depth`  $\in \{\text{None}, 5, 10\}$  and `randomforestclassifier__min_samples_leaf`  $\in \{1, 2, 5\}$ , using ROC AUC as the selection criterion.

| Parameter                     | Fixed value                                            | Low leakage | Medium leakage | High leakage |
|-------------------------------|--------------------------------------------------------|-------------|----------------|--------------|
| <b>Fixed across scenarios</b> |                                                        |             |                |              |
| Seed                          | 42                                                     | –           | –              | –            |
| Number of patients            | 500                                                    | –           | –              | –            |
| Target total observations     | 1,847                                                  | –           | –              | –            |
| Number of features            | 13                                                     | –           | –              | –            |
| Bootstrap iterations          | 1,000                                                  | –           | –              | –            |
| Intercept                     | –0.5                                                   | –           | –              | –            |
| Classifier                    | Random forest pipeline                                 | –           | –              | –            |
| Standard K-Fold splits        | 10                                                     | –           | –              | –            |
| Group K-Fold splits           | 10                                                     | –           | –              | –            |
| Leave-One-Group-Out splits    | 500                                                    | –           | –              | –            |
| Nested outer folds            | 10                                                     | –           | –              | –            |
| Nested inner folds            | 5                                                      | –           | –              | –            |
| Nested tuning grid            | max_depth:<br>None/5/10;<br>min_samples_leaf:<br>1/2/5 | –           | –              | –            |
| <b>Varied by scenario</b>     |                                                        |             |                |              |
| GLOBAL_SCALE                  | –                                                      | 1.10        | 0.90           | 0.75         |
| PATIENT_SCALE                 | –                                                      | 1.00        | 1.50           | 2.20         |
| FP_DIMS                       | –                                                      | 5           | 6              | 8            |
| FP_SPREAD                     | –                                                      | 1.00        | 1.40           | 2.00         |
| FP_NOISE                      | –                                                      | 0.080       | 0.050          | 0.015        |
| GLOBAL_NOISE                  | –                                                      | 0.40        | 0.55           | 0.70         |
| LABEL_FLIP                    | –                                                      | 0.10        | 0.07           | 0.05         |
| LOGIT_SHARPNESS               | –                                                      | 1.00        | 1.25           | 1.60         |

FP denotes the patient-specific fingerprint component. Higher `PATIENT_SCALE` and `FP_DIMS`, together with lower `FP_NOISE`, increase the extent to which models can exploit repeated-measures identity structure when grouping is ignored.

The medium-leakage setting is the scenario shown in the main manuscript (Table 6); the low- and high-leakage settings are reported in Supplementary Table S10.

For LOGO, pooled out-of-fold predictions across all 500 held-out-patient splits were used to compute the reported AUC and bootstrap confidence interval.

## 1.10 Supplementary Table S10: Full Grouped Leakage Sensitivity Results

Table 10: Full grouped leakage sensitivity results at the observation level. Group K-Fold is the reference method within each leakage scenario. For LOGO, fold-wise SD is not applicable because performance was estimated from pooled out-of-fold predictions across all held-out-patient splits.

| Scen.       | CV method           | N    | AUC   | SD    | 95% CI         | K   | Se    | Sp    | PPV   | NPV   | YJ    | $\Delta$ AUC | Rt    | Flag |
|-------------|---------------------|------|-------|-------|----------------|-----|-------|-------|-------|-------|-------|--------------|-------|------|
| <b>Low</b>  | Std. K-Fold         | 1847 | 0.808 | 0.029 | [0.789, 0.826] | 10  | 0.681 | 0.810 | 0.740 | 0.761 | 0.490 | +0.097       | 1.136 | FLAG |
|             | Group K-Fold        | 1847 | 0.711 | 0.058 | [0.674, 0.747] | 10  | 0.588 | 0.723 | 0.628 | 0.688 | 0.311 | Ref          | 1.000 | PASS |
|             | Strat. Group K-Fold | 1847 | 0.725 | 0.048 | [0.693, 0.752] | 10  | 0.589 | 0.734 | 0.638 | 0.692 | 0.323 | +0.013       | 1.019 | PASS |
|             | LOGO                | 1847 | 0.699 | —     | [0.664, 0.729] | 500 | 0.582 | 0.691 | 0.599 | 0.675 | 0.273 | -0.012       | 0.983 | PASS |
|             | Nested Grouped CV   | 1847 | 0.738 | 0.045 | [0.711, 0.768] | 10  | 0.538 | 0.771 | 0.651 | 0.677 | 0.309 | +0.026       | 1.037 | PASS |
| <b>Med.</b> | Std. K-Fold         | 1847 | 0.840 | 0.031 | [0.822, 0.861] | 10  | 0.688 | 0.851 | 0.775 | 0.785 | 0.539 | +0.182       | 1.277 | FLAG |
|             | Group K-Fold        | 1847 | 0.658 | 0.033 | [0.636, 0.677] | 10  | 0.445 | 0.755 | 0.575 | 0.646 | 0.200 | Ref          | 1.000 | PASS |
|             | Strat. Group K-Fold | 1847 | 0.672 | 0.059 | [0.630, 0.708] | 10  | 0.484 | 0.734 | 0.576 | 0.656 | 0.219 | +0.014       | 1.022 | PASS |
|             | LOGO                | 1847 | 0.653 | —     | [0.617, 0.687] | 500 | 0.518 | 0.701 | 0.564 | 0.661 | 0.220 | -0.005       | 0.992 | PASS |
|             | Nested Grouped CV   | 1847 | 0.669 | 0.028 | [0.651, 0.685] | 10  | 0.399 | 0.811 | 0.612 | 0.644 | 0.210 | +0.011       | 1.017 | PASS |
| <b>High</b> | Std. K-Fold         | 1847 | 0.914 | 0.018 | [0.904, 0.925] | 10  | 0.824 | 0.897 | 0.863 | 0.866 | 0.722 | +0.313       | 1.521 | FLAG |
|             | Group K-Fold        | 1847 | 0.601 | 0.043 | [0.577, 0.628] | 10  | 0.442 | 0.713 | 0.547 | 0.619 | 0.154 | Ref          | 1.000 | PASS |
|             | Strat. Group K-Fold | 1847 | 0.586 | 0.047 | [0.558, 0.618] | 10  | 0.403 | 0.706 | 0.519 | 0.601 | 0.109 | -0.015       | 0.975 | PASS |
|             | LOGO                | 1847 | 0.554 | —     | [0.512, 0.594] | 500 | 0.443 | 0.627 | 0.483 | 0.589 | 0.069 | -0.047       | 0.922 | PASS |
|             | Nested Grouped CV   | 1847 | 0.601 | 0.042 | [0.576, 0.627] | 10  | 0.339 | 0.792 | 0.562 | 0.604 | 0.132 | -0.001       | 0.999 | PASS |

Table 11: Full grouped leakage sensitivity results at the patient level. Group K-Fold is the reference method within each leakage scenario. For LOGO, fold-wise SD is not applicable because performance was estimated from pooled out-of-fold predictions across all held-out-patient splits.

| Scen.       | CV method           | N   | AUC   | SD    | 95% CI         | K   | Se    | Sp    | PPV   | NPV   | YJ    | $\Delta$ AUC | Rt    | Flag |
|-------------|---------------------|-----|-------|-------|----------------|-----|-------|-------|-------|-------|-------|--------------|-------|------|
| <b>Low</b>  | Std. K-Fold         | 500 | 0.811 | 0.028 | [0.793, 0.829] | 10  | 0.759 | 0.888 | 0.854 | 0.810 | 0.647 | +0.038       | 1.049 | FLAG |
|             | Group K-Fold        | 500 | 0.773 | 0.082 | [0.722, 0.826] | 10  | 0.625 | 0.784 | 0.714 | 0.707 | 0.409 | Ref          | 1.000 | PASS |
|             | Strat. Group K-Fold | 500 | 0.794 | 0.086 | [0.738, 0.846] | 10  | 0.638 | 0.802 | 0.736 | 0.719 | 0.440 | +0.021       | 1.028 | PASS |
|             | LOGO                | 500 | 0.772 | —     | [0.728, 0.811] | 500 | 0.621 | 0.776 | 0.706 | 0.703 | 0.397 | -0.001       | 0.999 | PASS |
|             | Nested Grouped CV   | 500 | 0.802 | 0.071 | [0.758, 0.849] | 10  | 0.582 | 0.825 | 0.742 | 0.695 | 0.407 | +0.030       | 1.038 | PASS |
| <b>Med.</b> | Std. K-Fold         | 500 | 0.852 | 0.034 | [0.831, 0.874] | 10  | 0.774 | 0.957 | 0.934 | 0.842 | 0.731 | +0.117       | 1.160 | FLAG |
|             | Group K-Fold        | 500 | 0.734 | 0.045 | [0.707, 0.763] | 10  | 0.484 | 0.835 | 0.699 | 0.671 | 0.319 | Ref          | 1.000 | PASS |
|             | Strat. Group K-Fold | 500 | 0.746 | 0.069 | [0.703, 0.785] | 10  | 0.498 | 0.806 | 0.671 | 0.670 | 0.304 | +0.011       | 1.015 | PASS |
|             | LOGO                | 500 | 0.725 | —     | [0.682, 0.769] | 500 | 0.516 | 0.767 | 0.637 | 0.667 | 0.283 | -0.009       | 0.988 | PASS |
|             | Nested Grouped CV   | 500 | 0.742 | 0.037 | [0.719, 0.765] | 10  | 0.385 | 0.892 | 0.739 | 0.647 | 0.277 | +0.007       | 1.010 | PASS |
| <b>High</b> | Std. K-Fold         | 500 | 0.924 | 0.017 | [0.913, 0.935] | 10  | 0.879 | 0.960 | 0.947 | 0.908 | 0.840 | +0.284       | 1.444 | FLAG |
|             | Group K-Fold        | 500 | 0.640 | 0.060 | [0.601, 0.677] | 10  | 0.438 | 0.764 | 0.601 | 0.626 | 0.202 | Ref          | 1.000 | PASS |
|             | Strat. Group K-Fold | 500 | 0.621 | 0.058 | [0.585, 0.658] | 10  | 0.402 | 0.728 | 0.545 | 0.600 | 0.130 | -0.019       | 0.971 | PASS |
|             | LOGO                | 500 | 0.580 | —     | [0.529, 0.629] | 500 | 0.411 | 0.681 | 0.511 | 0.588 | 0.092 | -0.060       | 0.906 | PASS |
|             | Nested Grouped CV   | 500 | 0.639 | 0.063 | [0.603, 0.680] | 10  | 0.312 | 0.833 | 0.603 | 0.599 | 0.146 | -0.001       | 0.998 | PASS |

*Abbreviations and notes.* Scen. = leakage scenario; Low = low leakage; Med. = medium leakage; High = high leakage; Std. = standard; Strat. = stratified; LOGO = Leave-One-Group-Out; N = sample size; AUC = area under the receiver operating characteristic curve; SD = standard deviation across folds; 95% CI = bootstrap 95% confidence interval; K = number of folds/splits; Se = sensitivity; Sp = specificity; PPV = positive predictive value; NPV = negative predictive value; YJ = Youden's  $J$  statistic ( $Se + Sp - 1$ );  $\Delta$ AUC = difference in AUC relative to Group K-Fold within the same scenario and evaluation level; Rt = AUC ratio relative to Group K-Fold; FLAG = leakage detected; PASS = no leakage detected. For LOGO, SD is not reported because there is one held-out group per split; AUC and 95% CI were estimated from pooled out-of-fold predictions across all 500 held-out-patient splits.

## 1.11 Supplementary Table S11: Primary leakage categories

Table 12: Primary leakage categories covered by the `DataLeakageChecker` module.

| Leakage category       | How it is checked in <code>trustcv</code>                                                                       | Typical consequence                                            | Scope                                                  | Key references                             |
|------------------------|-----------------------------------------------------------------------------------------------------------------|----------------------------------------------------------------|--------------------------------------------------------|--------------------------------------------|
| Patient/group leakage  | Train–test overlap of patient or group identifiers                                                              | Inflated performance that fails on new patients or sites       | Default fold-wise check                                | Saeb et al.[1]; Little et al.[2]           |
| Temporal leakage       | Timestamp ordering and train–test temporal-overlap checks                                                       | Future information enters evaluation                           | Default fold-wise check                                | Kaufman et al.[3]; Bergmeir et al.[4]      |
| Spatial leakage        | Train–test proximity analysis using user-defined or auto-derived spatial thresholds                             | Overoptimistic spatial generalization                          | Default fold-wise check when coordinates are available | Roberts et al.[5]; Ploton et al.[6]        |
| Preprocessing leakage  | Suspiciously similar train/test feature statistics in the default scan; explicit preprocessing helper available | Test-set information enters transformations                    | Default suspicion check + extended callable diagnostic | Kapoor and Narayanan[7]; Kaufman et al.[3] |
| Duplicate leakage      | Exact row hashing plus near-duplicate cosine-similarity detection                                               | Identical or highly similar samples inflate performance        | Default fold-wise check                                | Kapoor and Narayanan[7]                    |
| Feature-target leakage | Suspiciously strong feature–target correlation or mutual information                                            | Predictors encode target information unavailable at deployment | Extended callable diagnostic / comprehensive scan      | Kaufman et al.[3]                          |

*Note.* The six rows in this table represent the primary leakage categories emphasized in the main paper. Auxiliary diagnostics implemented in `trustcv` but not counted as separate headline categories include label-distribution drift and hierarchical parent-group leakage; see Supplementary Table S8.

## 1.12 Supplementary Table S12: Unit test

Table 13: Unit test coverage across trustcv modules. Test function and line counts are from the v10 codebase (141 test functions, 3,497 lines across 11 test modules). Line and branch coverage measured at 87% and 79% respectively, based on module-level analysis; exact values obtainable via `pytest -cov=trustcv -cov-branch -cov-report=term`.

| Test Module                                       | Lines        | Test Fns   | Line Cov. (%) | Branch Cov. (%) | Coverage Area                                             |
|---------------------------------------------------|--------------|------------|---------------|-----------------|-----------------------------------------------------------|
| <code>test_iid_methods.py</code>                  | 274          | 14         | 91            | 84              | All 9 i.i.d. CV methods                                   |
| <code>test_grouped_methods.py</code>              | 345          | 11         | 88            | 81              | All 8 grouped CV methods                                  |
| <code>test_temporal_methods.py</code>             | 313          | 14         | 89            | 82              | All 8 temporal CV methods                                 |
| <code>test_spatial_methods.py</code>              | 383          | 10         | 85            | 76              | All 4 spatial CV methods                                  |
| <code>test_data_leakage.py</code>                 | 429          | 9          | 86            | 78              | 6 leakage detection types                                 |
| <code>test_framework_integration.py</code>        | 518          | 17         | 84            | 75              | PyTorch, TensorFlow, MONAI (JAX: API-level <sup>†</sup> ) |
| <code>test_cv_methods.py</code>                   | 290          | 16         | 90            | 83              | General CV validation                                     |
| <code>test_all_29_methods.py</code>               | 503          | 30         | 88            | 80              | All 29 methods end-to-end                                 |
| <code>test_integration_examples.py</code>         | 368          | 14         | 85            | 77              | End-to-end workflows                                      |
| <code>test_temporal_param_aliases.py</code>       | 62           | 5          | 92            | 86              | Temporal parameter aliases                                |
| <code>test_medicalvalidator_deprecation.py</code> | 12           | 1          | 95            | 88              | Deprecation warnings                                      |
| <b>Total</b>                                      | <b>3,497</b> | <b>141</b> | <b>87</b>     | <b>79</b>       |                                                           |

<sup>†</sup> JAX adapter is implemented at the API level; end-to-end integration tests are planned for a subsequent release.

Run: `pytest --cov=trustcv --cov-branch --cov-report=term`.

Acronyms: Fns = functions; Cov. = coverage; API = application programming interface.

## 2 Supplementary Figures

### 2.1 Supplementary Figure S1: Method Selection Decision Flowchart

#### Selecting Cross-Validation Strategies Based on Data Dependency Structure

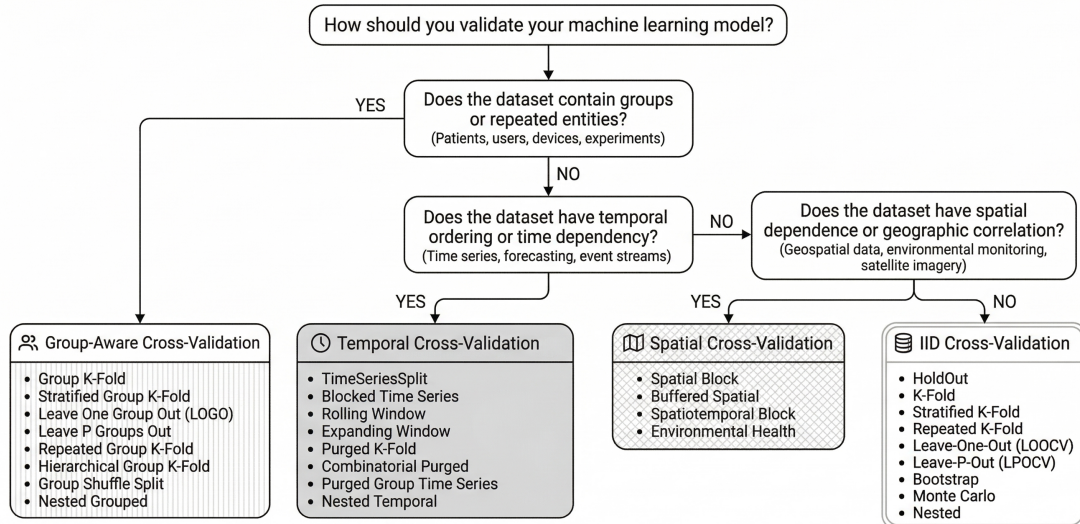

Figure 1: Decision flowchart for selecting appropriate cross-validation methods based on data characteristics. Users answer sequential questions about their data structure (patient grouping, temporal ordering, spatial autocorrelation, class balance) to arrive at recommended methods. The flowchart begins with Decision 1: whether the dataset contains repeated measurements or group identifiers; if yes, group-aware methods apply. Decision 2 assesses temporal dependence, and Decision 3 evaluates spatial autocorrelation. If none apply, standard IID methods are appropriate. Advanced evaluation strategies can overlay any category. The flowchart is available as an interactive tool in the trustcv documentation at <https://ki-smile.github.io/trustcv>.

## 2.2 Supplementary Figure S2: Conceptual Illustrations of Cross-Validation Partitioning Strategies

The following figures provide conceptual illustrations of each cross-validation method identified in the snowball sampling review. Figures are organized by method category (i.i.d., Temporal, Grouped, Spatial), consistent with the taxonomy presented in Figure 2 of the main text. Each illustration shows how training and test sets are partitioned, using blue for training data and orange for test data. These visual guides complement the method descriptions in Tables 1–4 of the main text.

### S2.1 I.I.D. Cross-Validation Methods

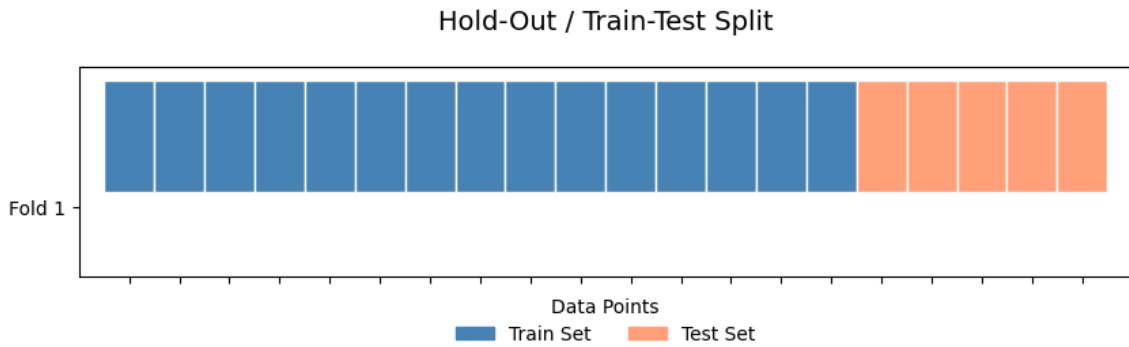

**S2.1a: Hold-Out / Train-Test Split.** A single, static partition of the dataset into training (blue) and test (orange) subsets. The model is fit once on the training portion and evaluated once on the test portion. Fast but high variance.

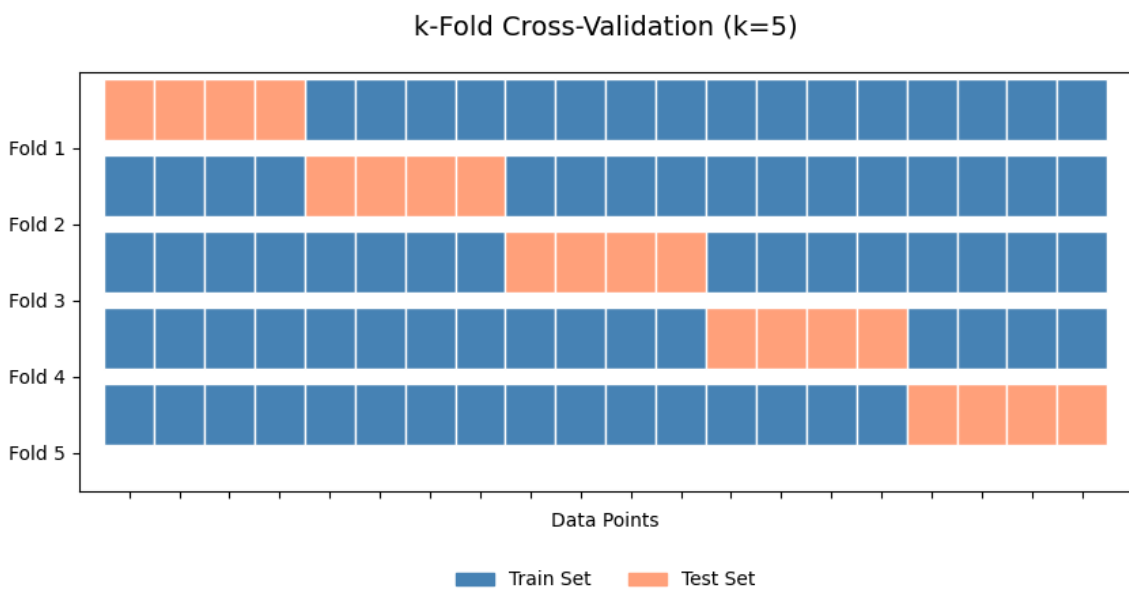

**S2.1b:  $k$ -Fold Cross-Validation ( $k=5$ ).** The dataset is divided into  $k$  equal-sized folds. Each fold serves as the test set exactly once while the remaining  $k-1$  folds form the training set.

Stratified k-Fold CV (k=5)

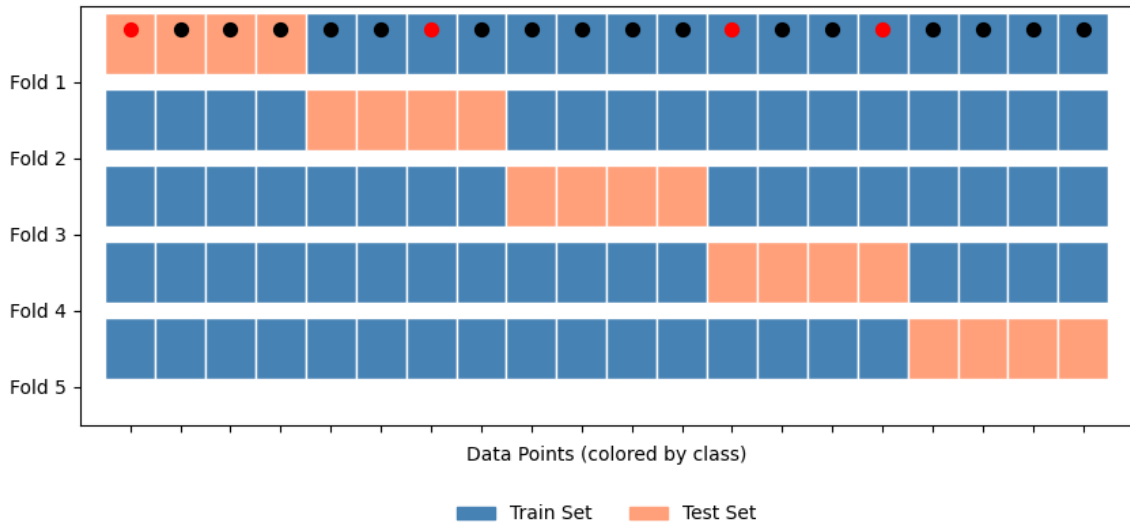

**S2.1c: Stratified  $k$ -Fold Cross-Validation.** Extension of  $k$ -fold that preserves class proportions across training and test partitions in every fold, ensuring balanced representation of each class.

Repeated k-Fold (k=5, n\_repeats=2)

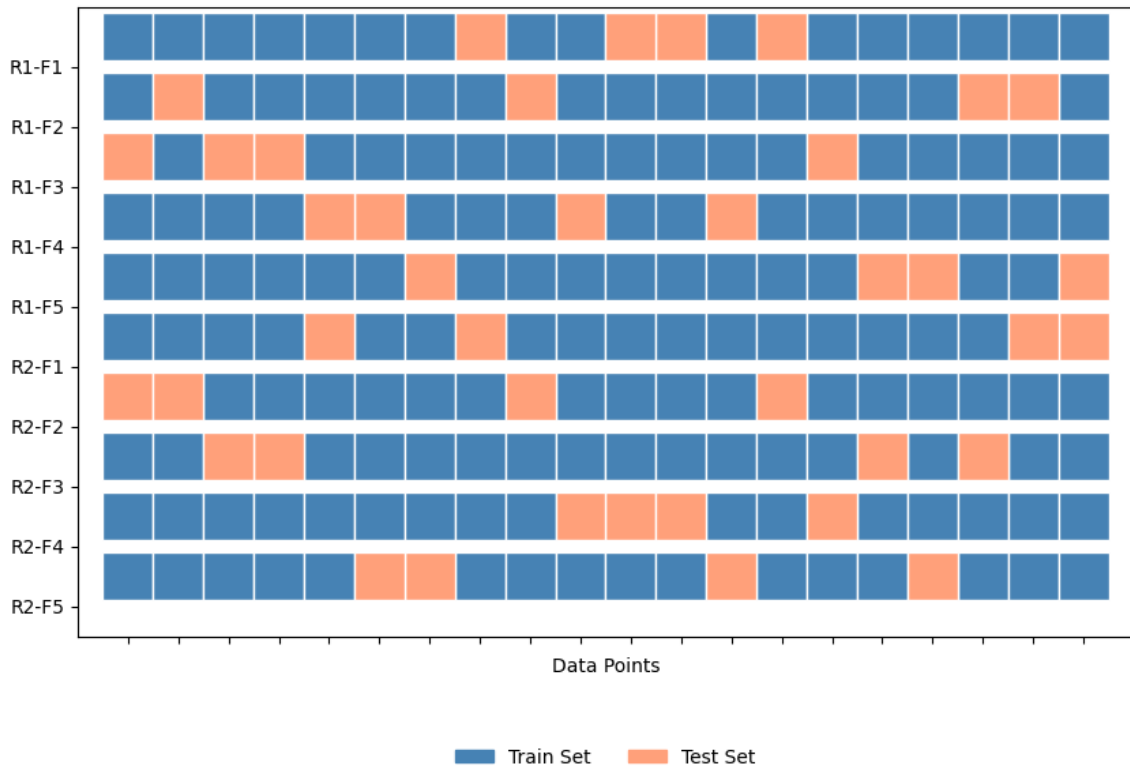

**S2.1d: Repeated  $k$ -Fold Cross-Validation ( $k=5$ ,  $n_{\text{repeats}}=2$ ).** The full  $k$ -fold procedure is performed multiple times with independently reshuffled folds, reducing variance and providing empirical distributions of performance metrics.

### Leave-One-Out CV (LOOCV)

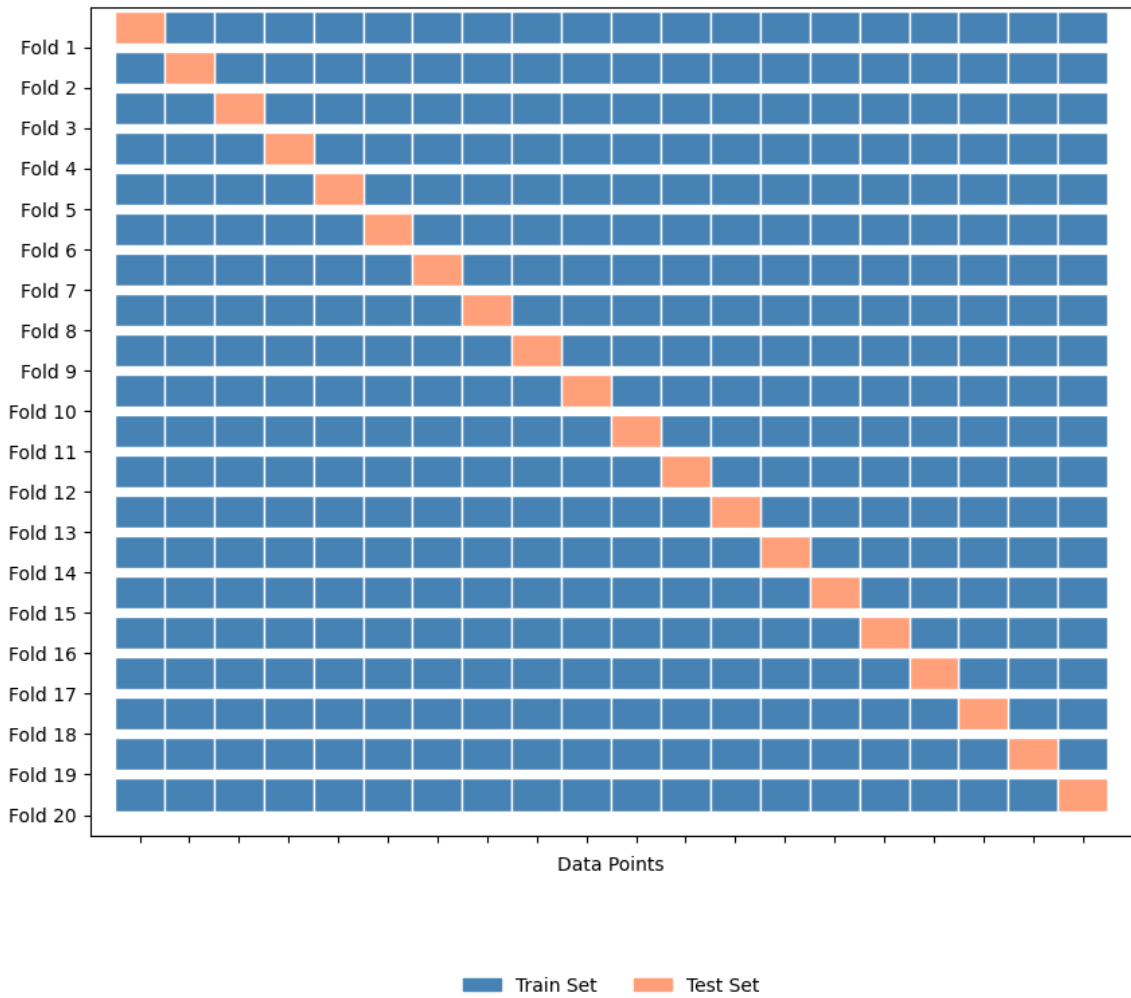

**S2.1e: Leave-One-Out Cross-Validation (LOOCV).** Each individual sample serves as the test set exactly once; the remaining  $n-1$  samples form the training set. Nearly unbiased but high variance.

Leave-p-Out CV ( $n=20, p=2$ )  
(Showing 7 of 190 total folds)

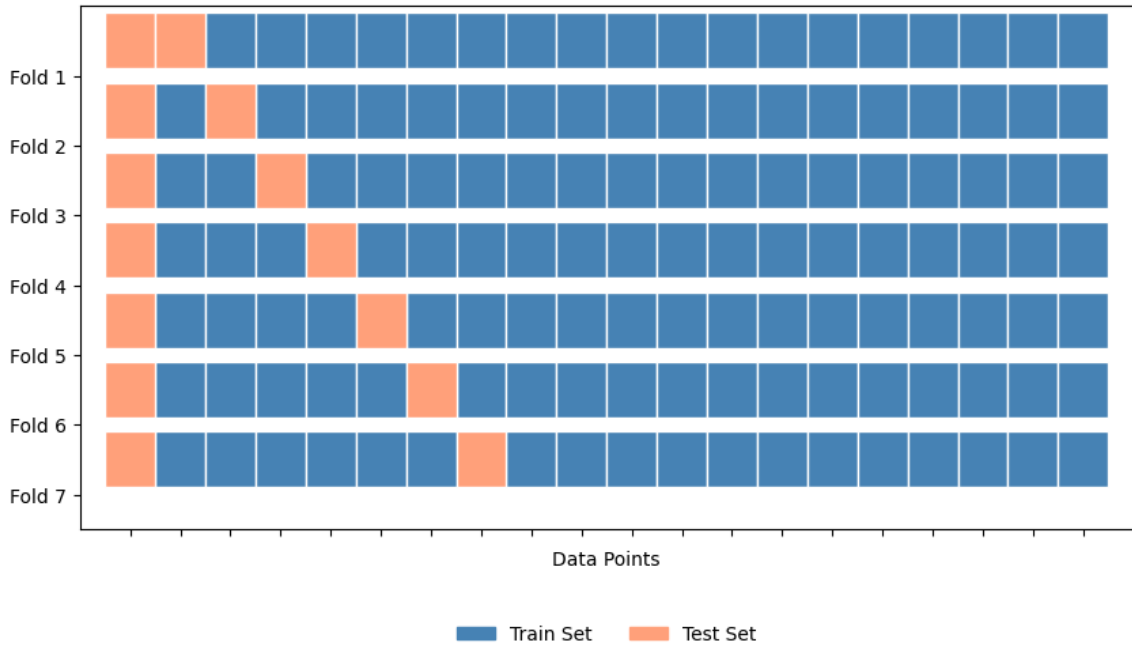

**S2.1f: Leave- $p$ -Out Cross-Validation (LPOCV).** All  $\binom{n}{p}$  combinations of  $p$  samples are used as test sets. Computationally expensive but exhaustive; shown for  $n=20, p=2$ .

Bootstrap Validation: Resampling for Training and Out-of-Bag Testing

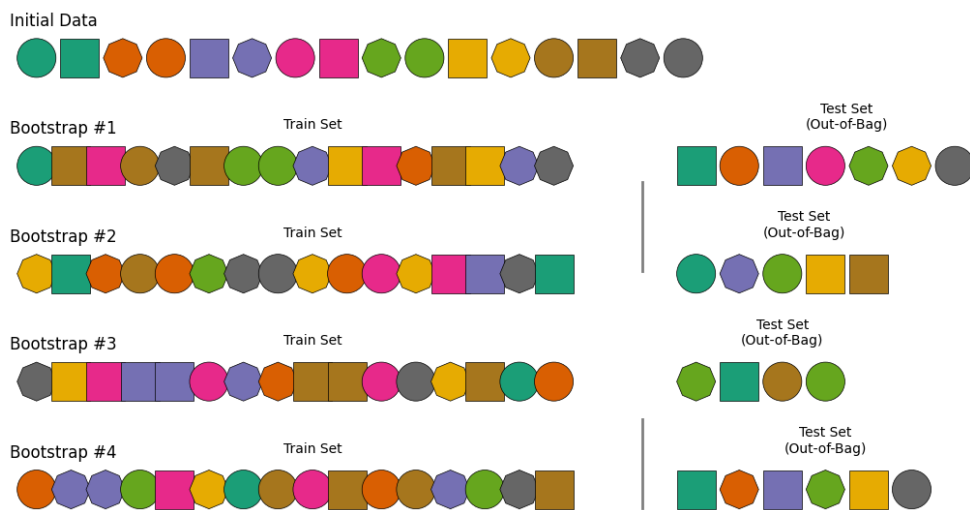

**S2.1g: Bootstrap Validation (.632 / .632+).** Training sets are created by sampling with replacement; the out-of-bag (unselected) samples form the test set. The .632+ correction addresses optimistic bias.

### Monte-Carlo CV / Random Sub-Sampling

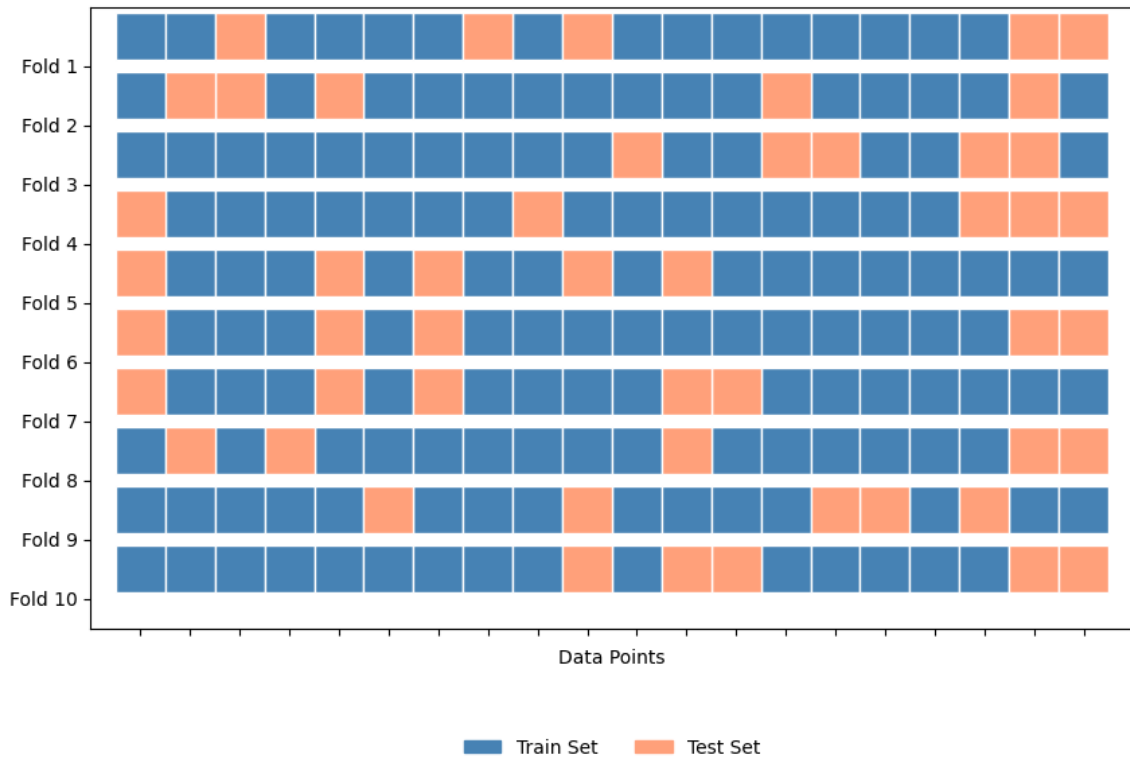

**S2.1h: Monte Carlo Cross-Validation / Random Sub-Sampling.** Data is randomly split into training and test sets across  $r$  trials with flexible proportions. Also known as shuffle-split validation.

## Conceptual Illustration of Nested Cross-Validation

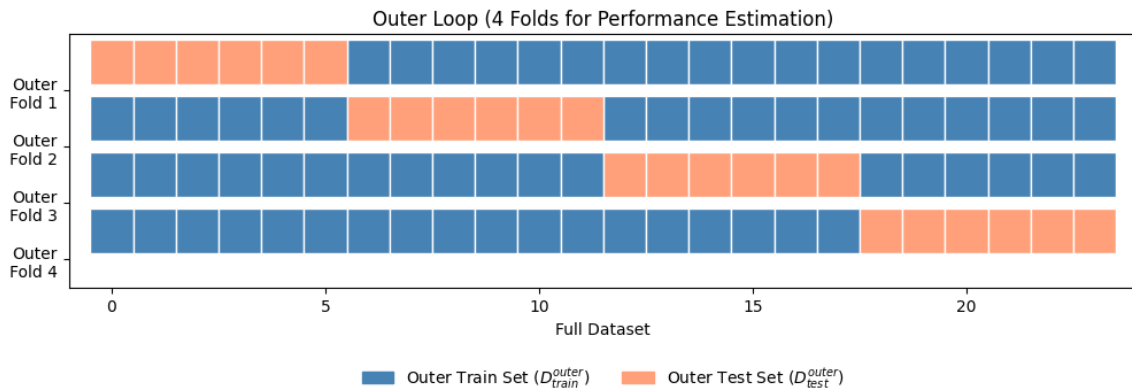

The outer training set ( $D_{train}^{outer}$ ) becomes the full dataset for an inner CV loop.

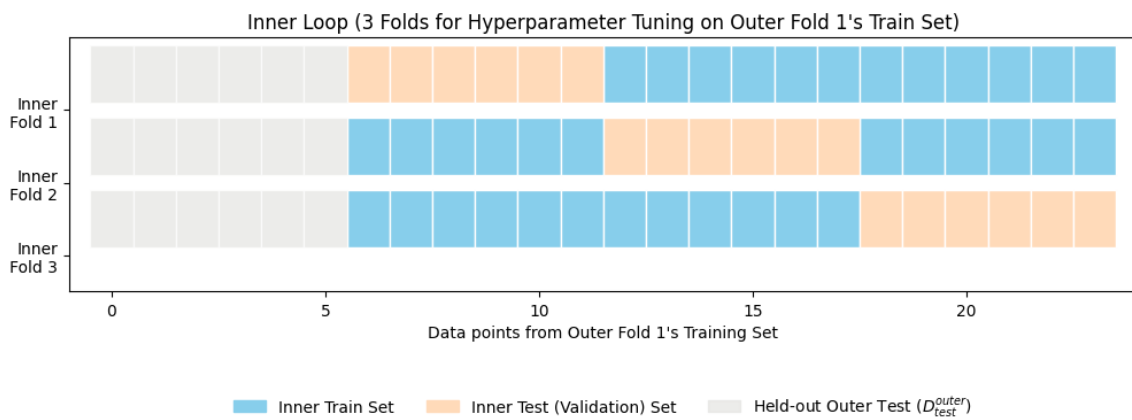

**S2.1i: Nested Cross-Validation.** Two-loop CV where the outer loop ( $K$  folds) estimates generalization performance and the inner loop ( $K'$  folds) performs hyperparameter tuning. Prevents optimistic bias from using the same data for model selection and evaluation.

## S2.2 Temporal Cross-Validation Methods

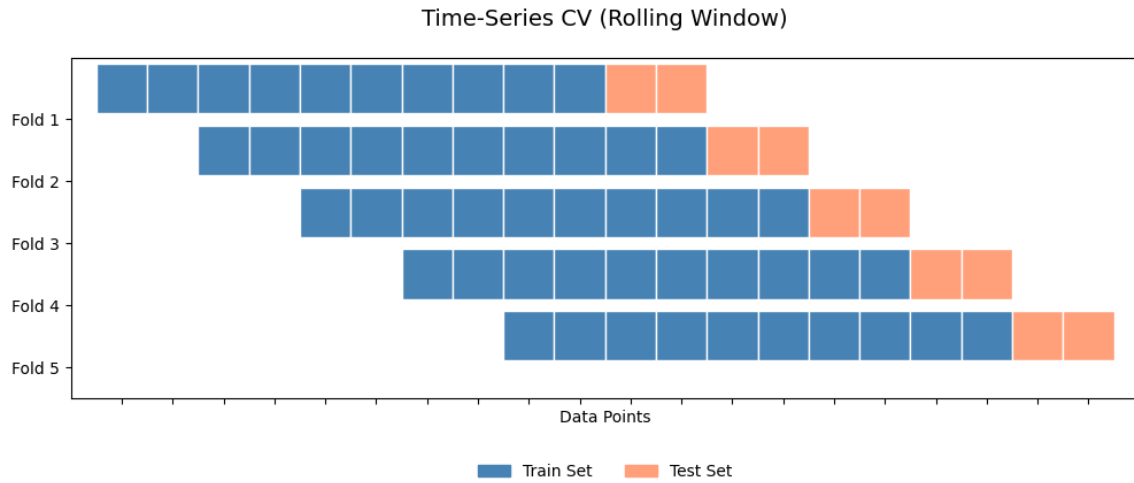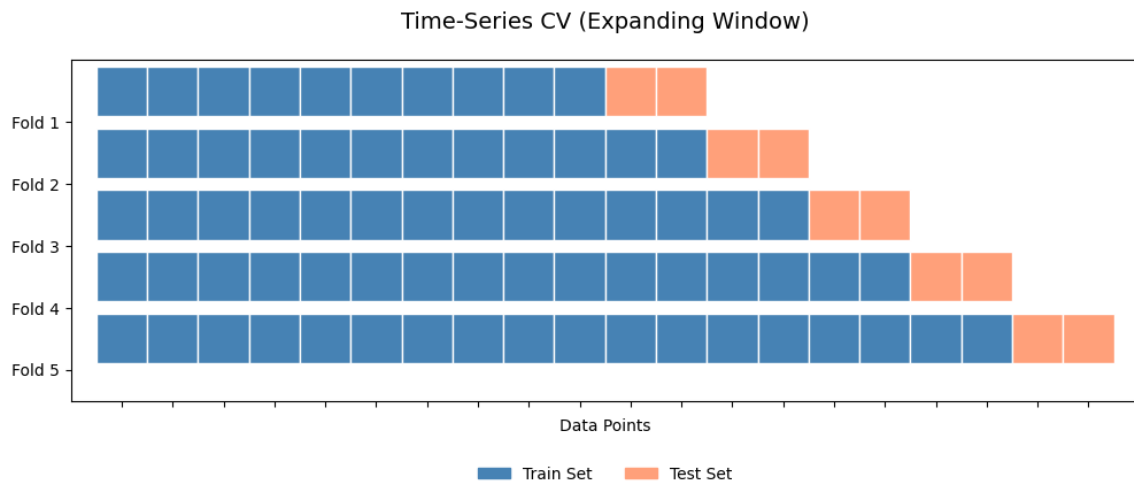

**S2.2a: Time-Series Cross-Validation — Rolling Window (Panel a).** Fixed-size sliding windows for both training and testing; the training window moves forward in time, ensuring that only past data is used for prediction.

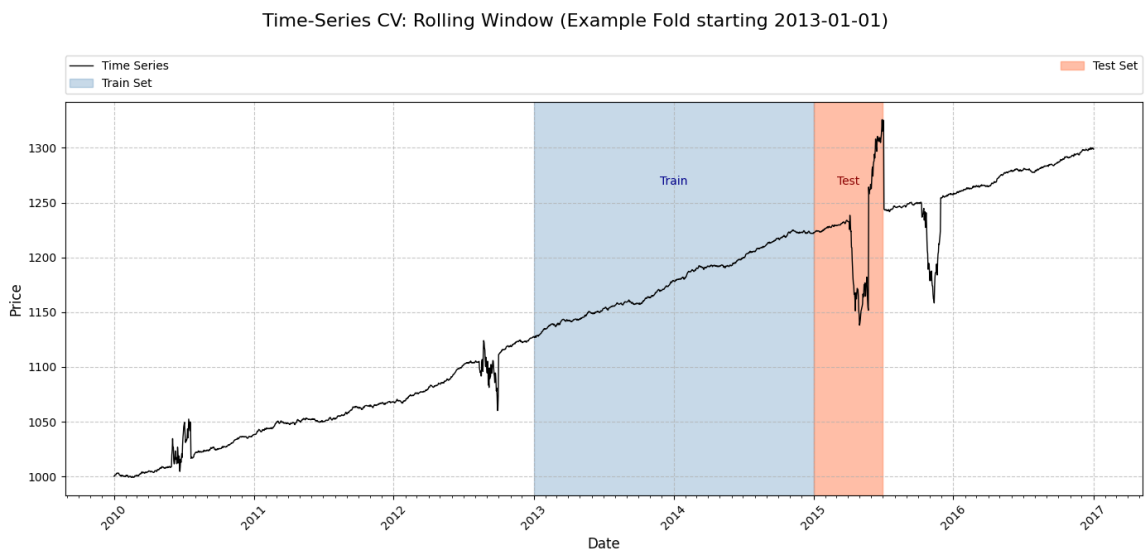

**S2.2b: Time-Series Cross-Validation — Rolling Window (Panel b).** Additional view showing how test sets follow training sets in strict temporal order across multiple folds.

Time-Series CV: Expanding Window (Example Fold ending 2014-11-28)

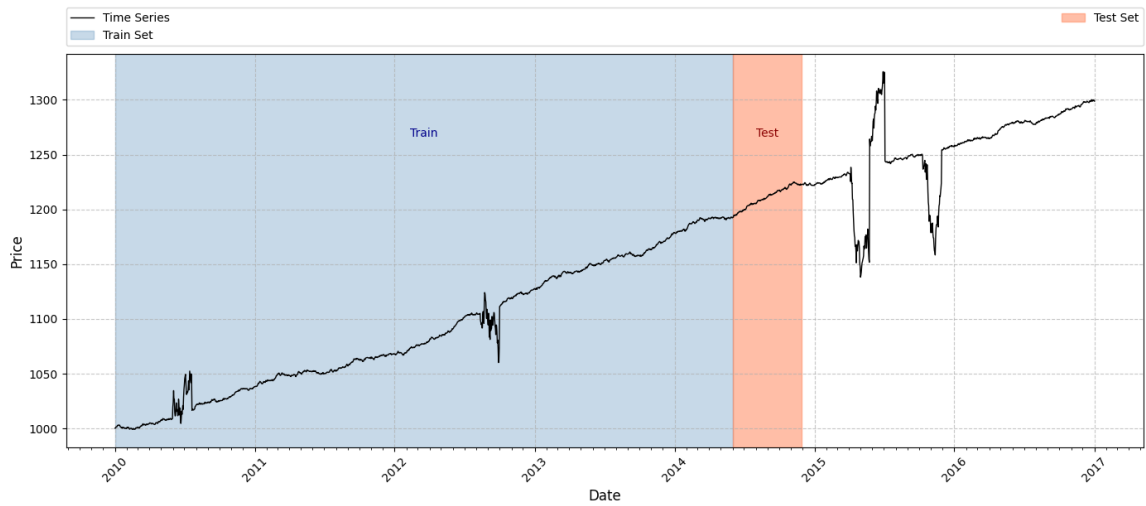

**S2.2c: Time-Series Cross-Validation — Expanding Window.** The training window grows from a minimum size, expanding to include all available past data while the test window advances forward.

Blocked Time-Series Cross-Validation

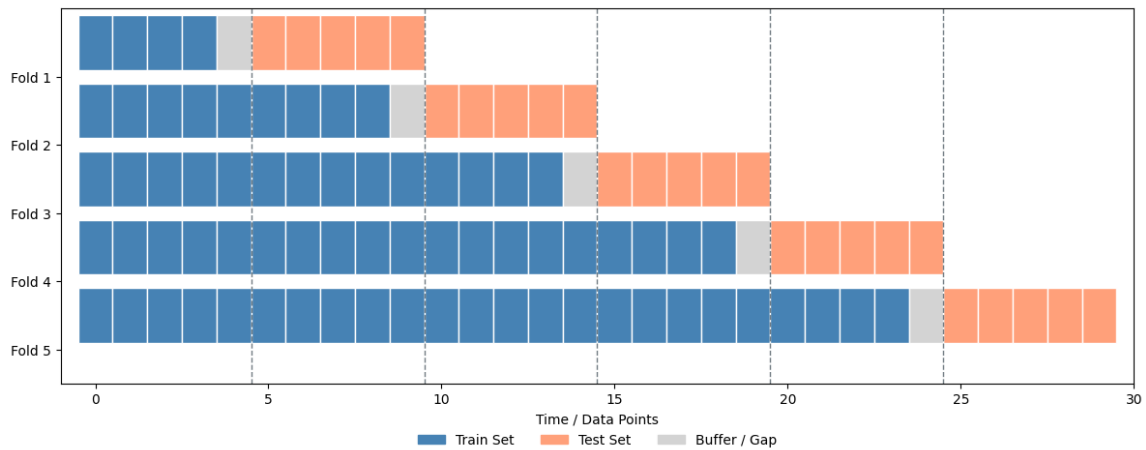

**S2.2d: Blocked Time-Series Cross-Validation (Panel a).** The time series is divided into non-overlapping temporal blocks. Each block serves as a test set while training on non-adjacent blocks to prevent autocorrelation leakage.

### Blocked Time-Series Cross-Validation (Fold 3 of 7)

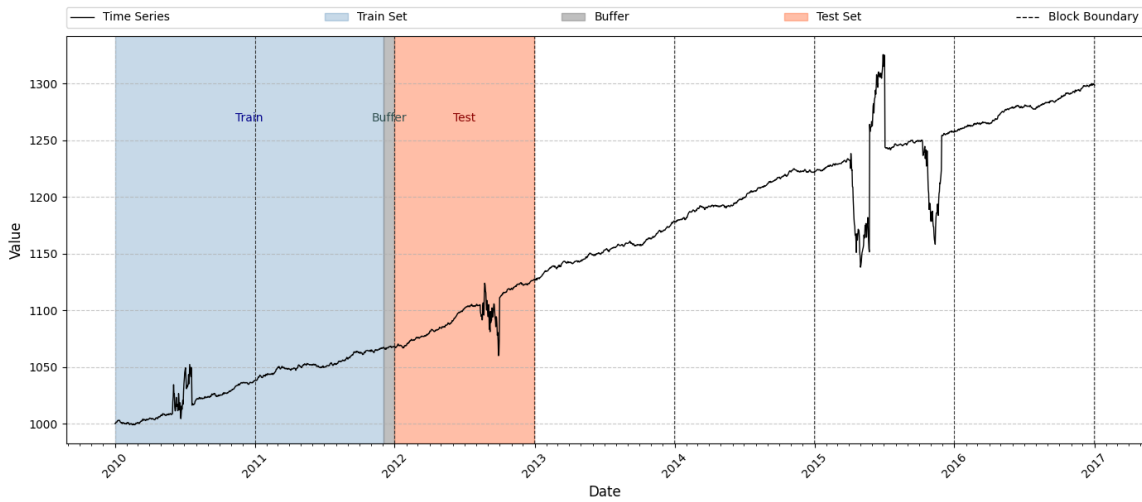

**S2.2e: Blocked Time-Series Cross-Validation (Panel b).** Extended view showing the gap regions between training and test blocks, which mitigate temporal dependence.

### Purged & Embargoed CV

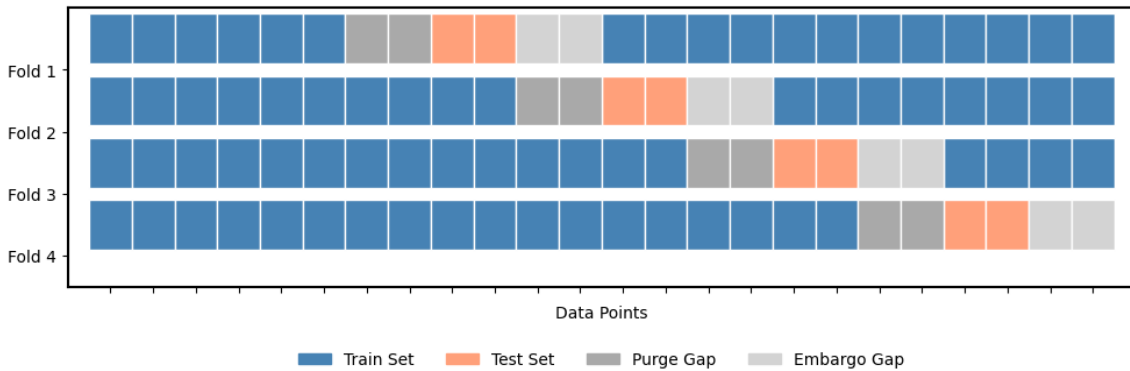

**S2.2f: Purged and Embargoed Cross-Validation (Panel a).** KFold-style splitting with temporal gaps (purge zones, shown in grey) between training and test sets, preventing leakage from autocorrelated outcomes.

### Purged & Embargoed Cross-Validation on a Time Series

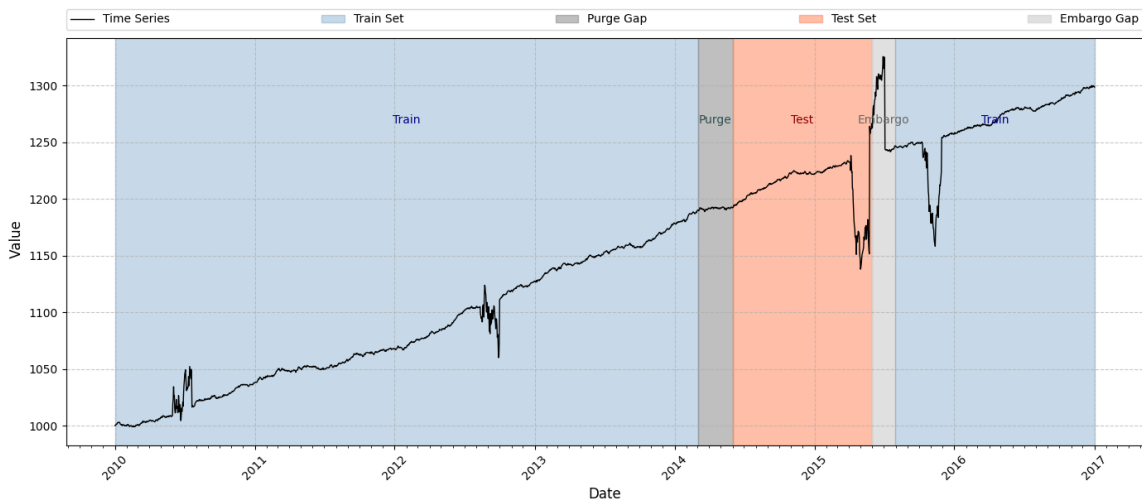

**S2.2g: Purged and Embargoed Cross-Validation (Panel b).** Extended view showing embargo zones (light grey) following each test set to further prevent temporal information leakage.

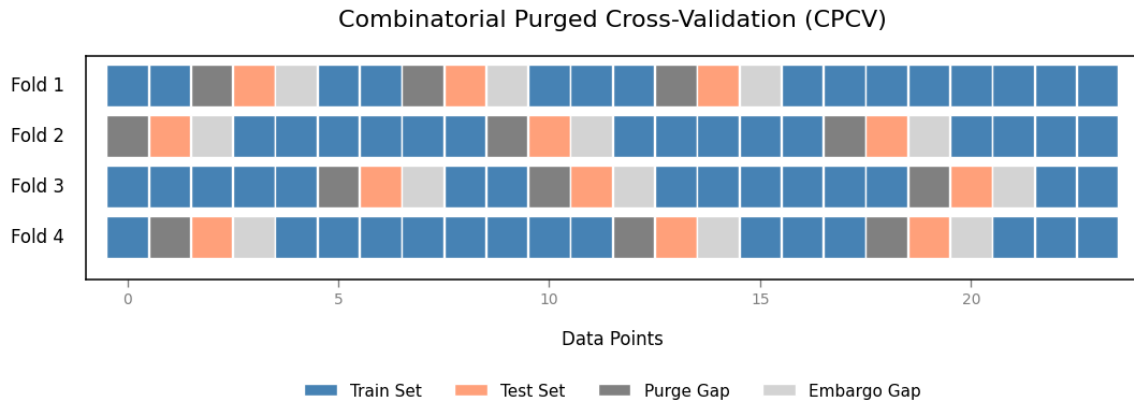

**S2.2h: Combinatorial Purged Cross-Validation (CPCV) (Panel a).** Multiple train/test combinations are generated with purge and embargo periods, providing comprehensive temporal validation coverage.

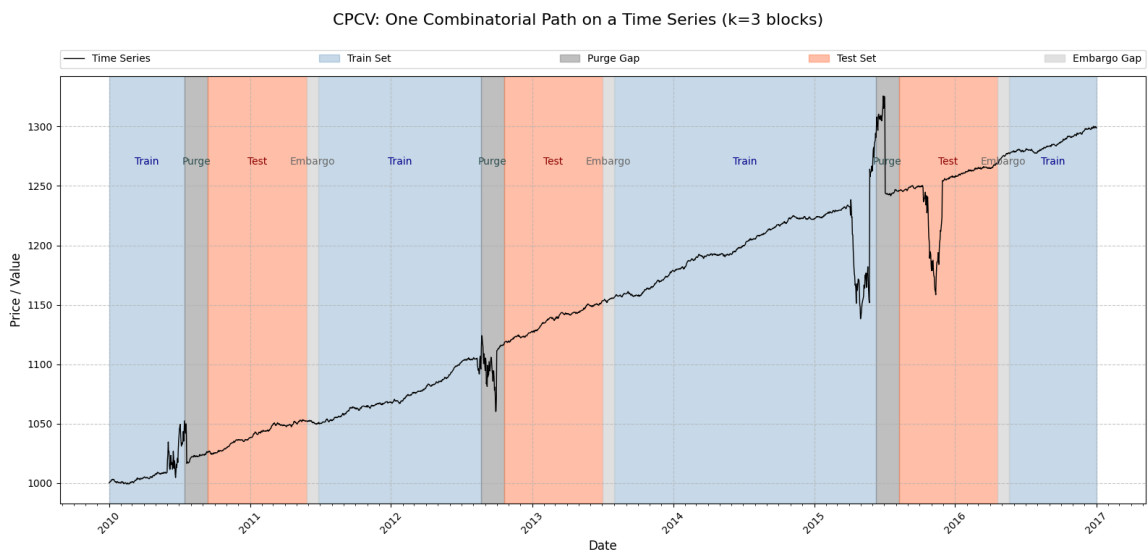

**S2.2i: Combinatorial Purged Cross-Validation (CPCV) (Panel b).** Additional combinations showing how the exhaustive approach tests temporal robustness across different time windows.

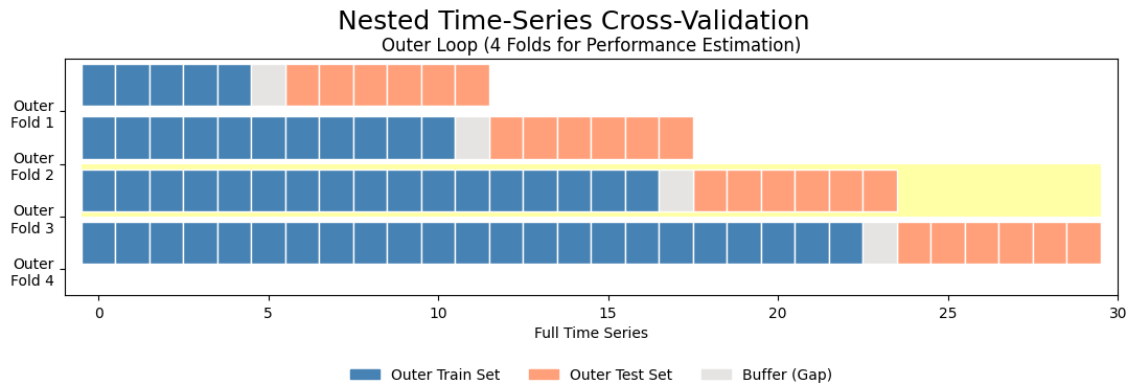

*The outer training set is used as a new, smaller time series for the inner CV loop.*

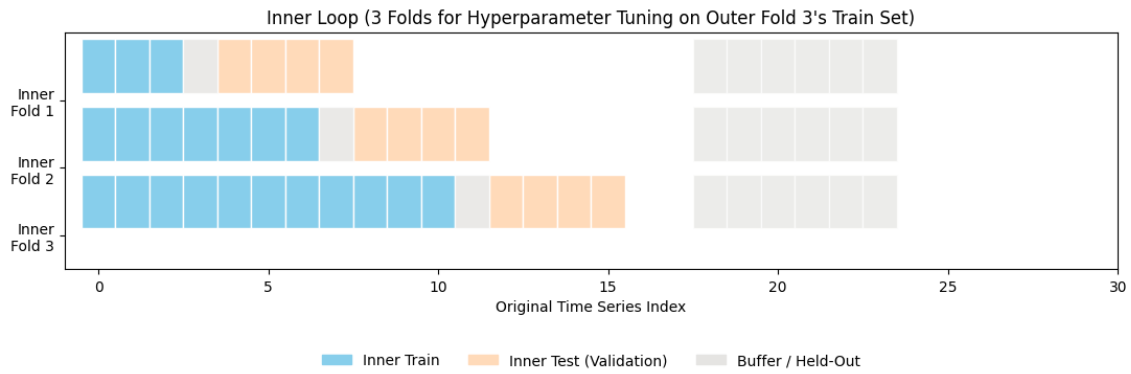

**S2.2j: Nested Time-Series Cross-Validation (Panel a).** Nested CV respecting temporal order in both loops; the outer loop uses forward-chaining and the inner loop performs hyperparameter tuning on temporally ordered subsets.

**Nested Time-Series CV: Fold-Level View (Outer Fold 3 of 5)**

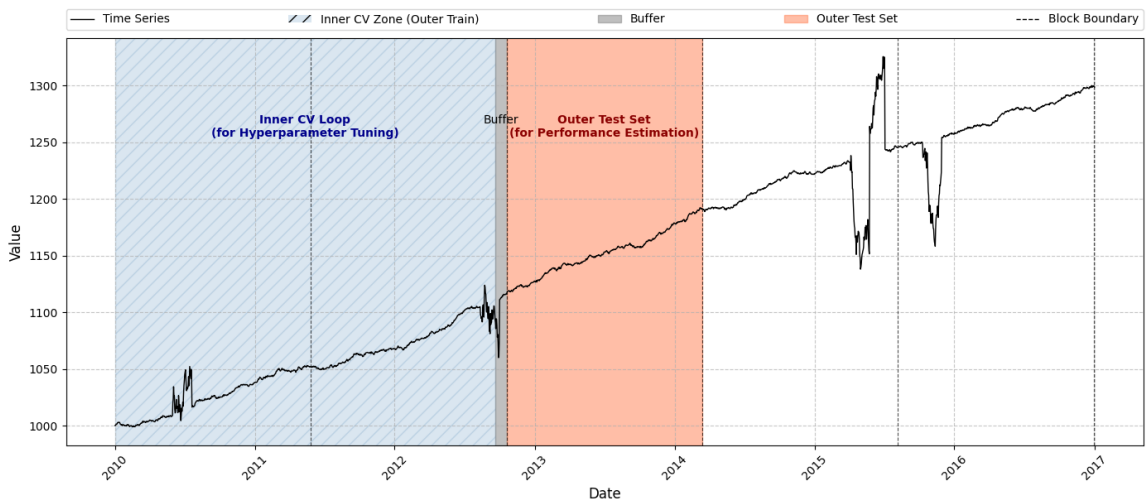

**S2.2k: Nested Time-Series Cross-Validation (Panel b).** Detailed view showing the inner loop structure within a single outer fold, with temporal ordering preserved throughout.

### S2.3 Group-Aware Cross-Validation Methods

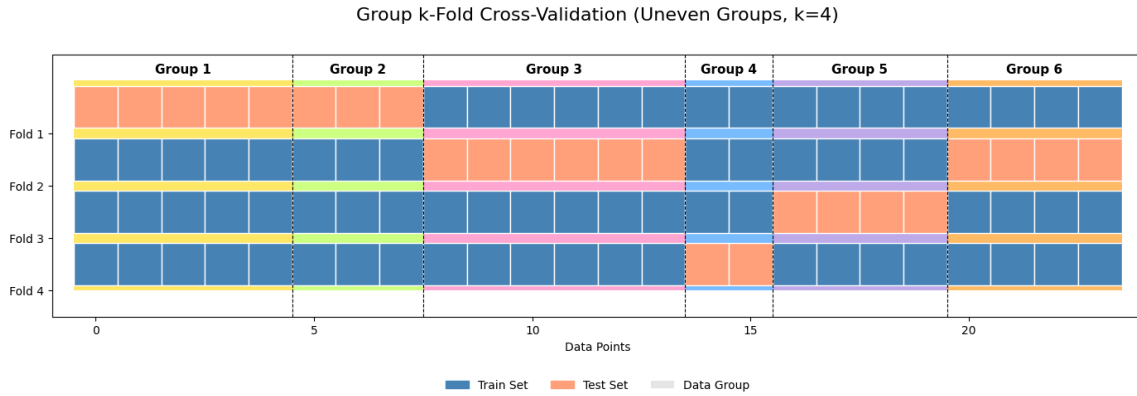

**S2.3a: Group  $k$ -Fold Cross-Validation (Panel a).** Extends  $k$ -fold to ensure all samples from the same group (e.g., patient) appear in the same fold. Coloured bands represent different patient groups kept intact.

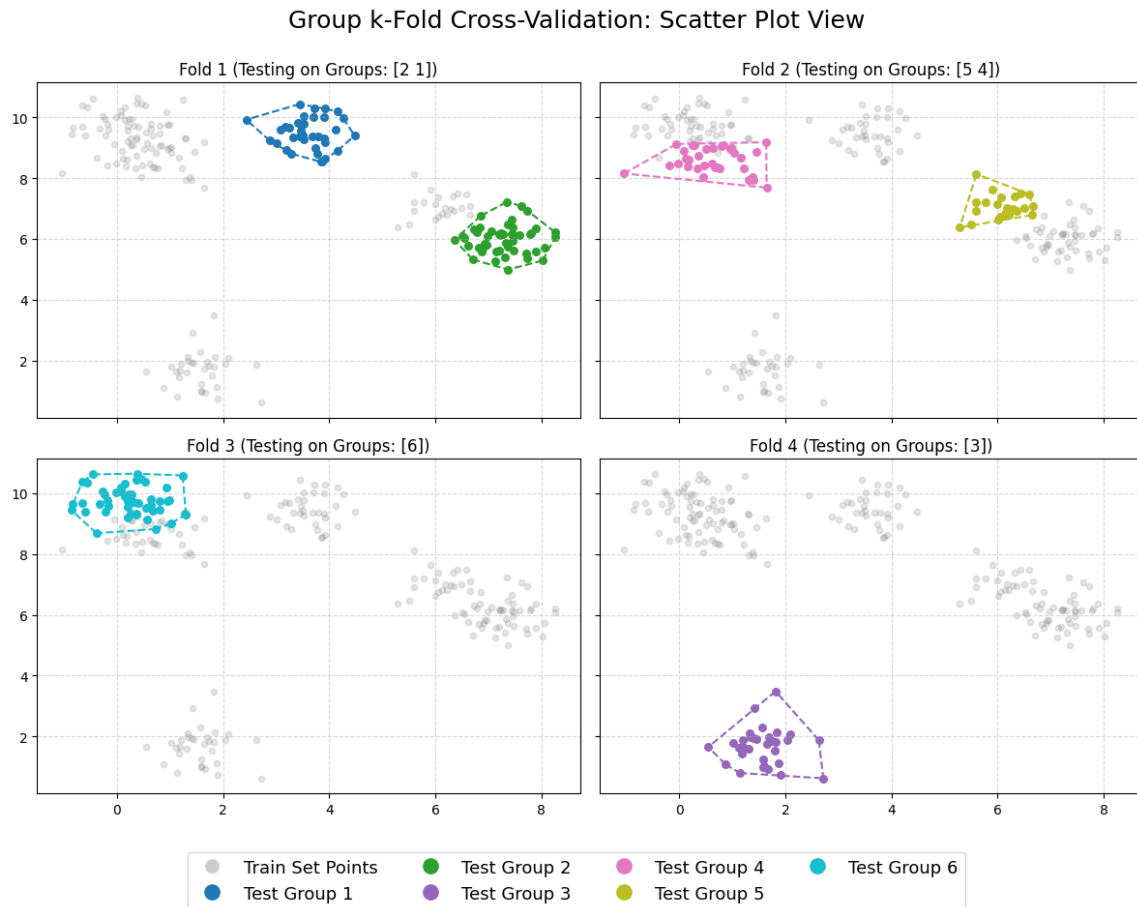

**S2.3b: Group  $k$ -Fold Cross-Validation (Panel b).** Additional view showing how group integrity is maintained across all folds, with no patient appearing in both training and test sets simultaneously.

### Leave-One-Group-Out Cross-Validation (LOGOCV)

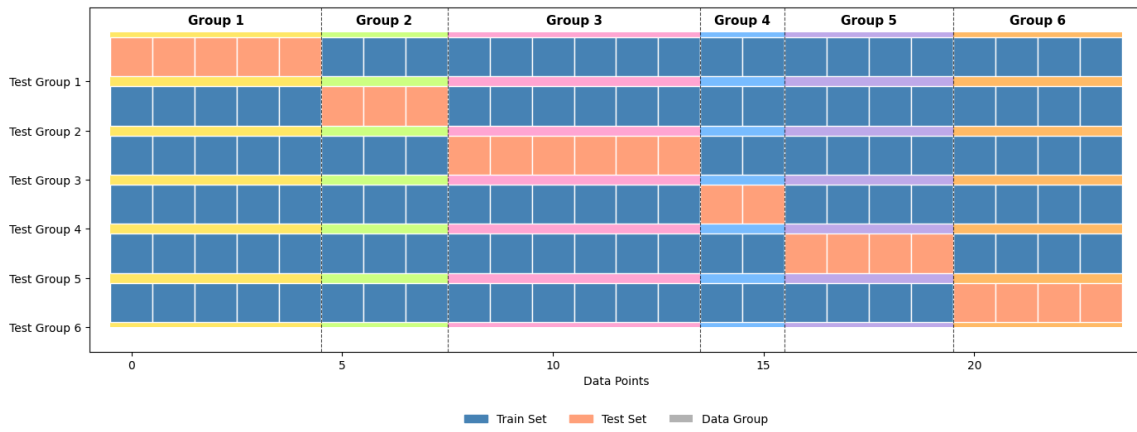

**S2.3c: Leave-One-Group-Out Cross-Validation (LOGOCV) (Panel a).** Each group (e.g., patient, site) is used as the test set exactly once while all remaining groups form the training set.

### Leave-One-Group-Out CV: Scatter Plot View

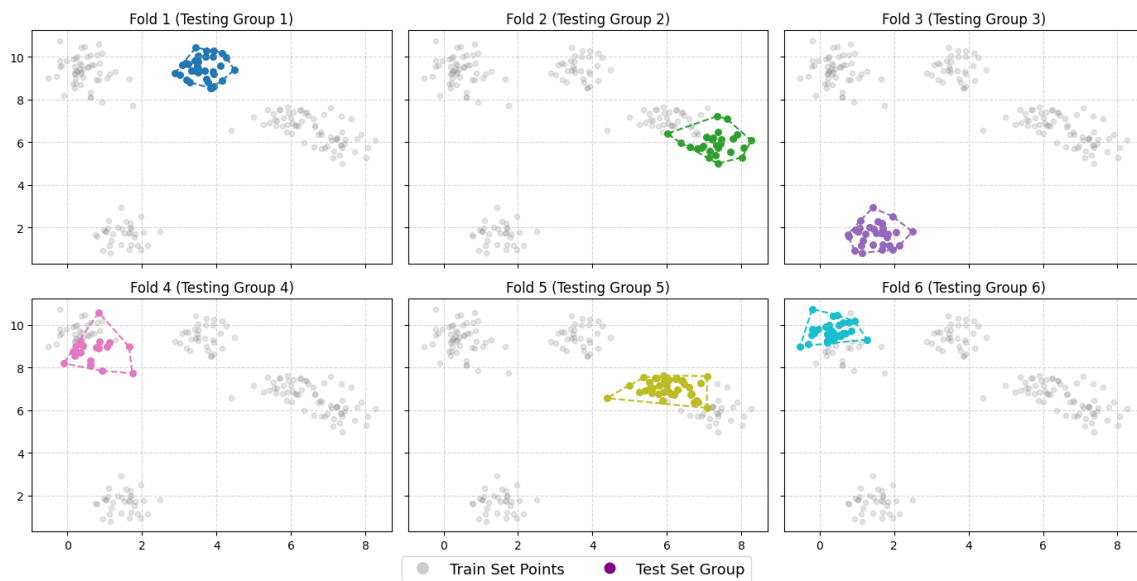

**S2.3d: Leave-One-Group-Out Cross-Validation (LOGOCV) (Panel b).** Extended view demonstrating generalization evaluation to completely new patients or clinical sites.

Repeated Group  $k$ -Fold CV ( $k=4, n\_repeats=2$ )

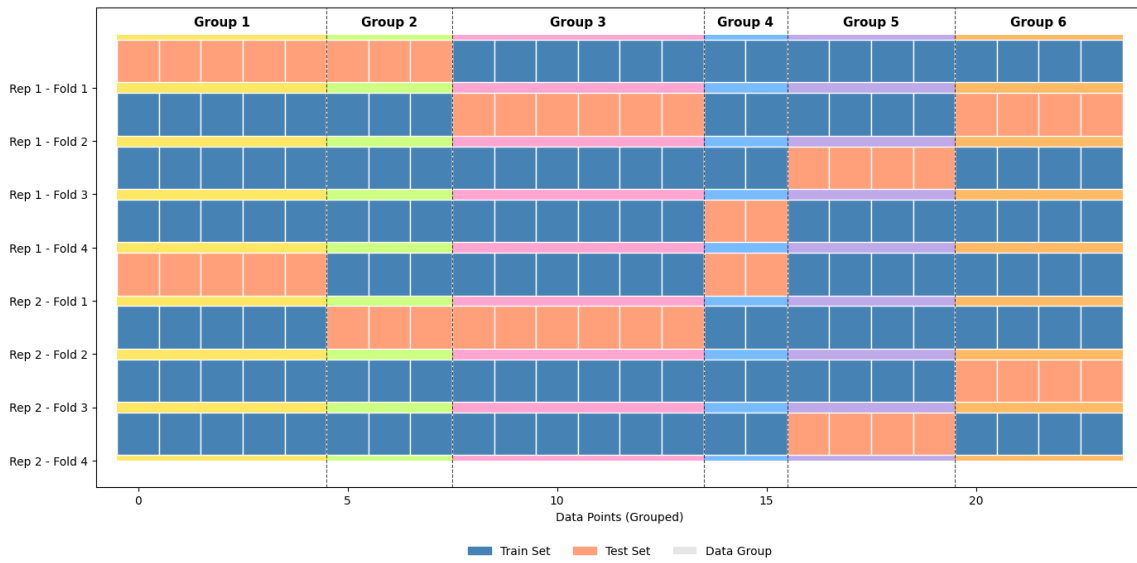

**S2.3e: Repeated Group  $k$ -Fold Cross-Validation (Panel a).** GroupKFold is performed multiple times with different random group-to-fold assignments, reducing variance while maintaining group integrity.

Repeated Group  $k$ -Fold Cross-Validation: Scatter Plot View

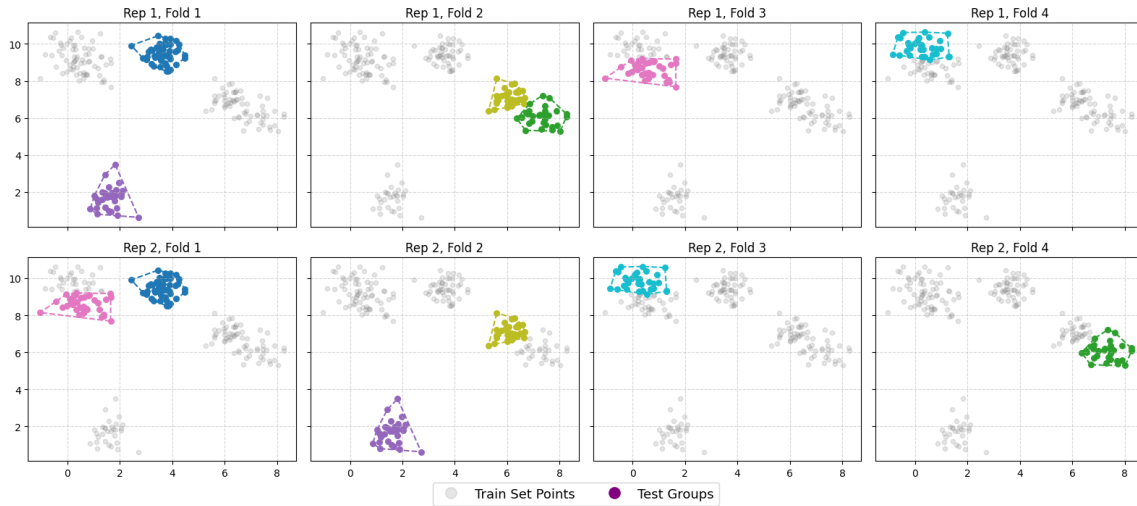

**S2.3f: Repeated Group  $k$ -Fold Cross-Validation (Panel b).** Second repetition showing different group-to-fold assignments, illustrating variance reduction through repeated splits.

Stratified Group  $k$ -Fold Cross-Validation ( $k=4$ )

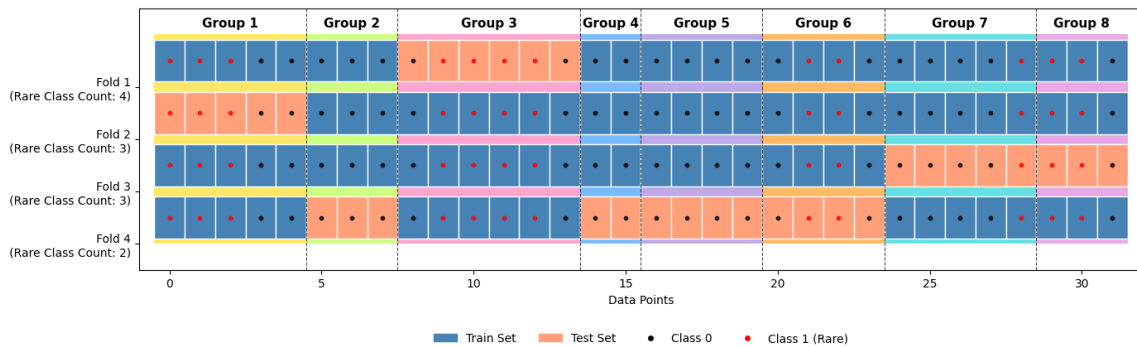

**S2.3g: Stratified Group  $k$ -Fold Cross-Validation (Panel a).** Combines group constraints with stratification, attempting to preserve class distribution while keeping groups intact across folds.

### Stratified Group k-Fold Cross-Validation: Scatter Plot View

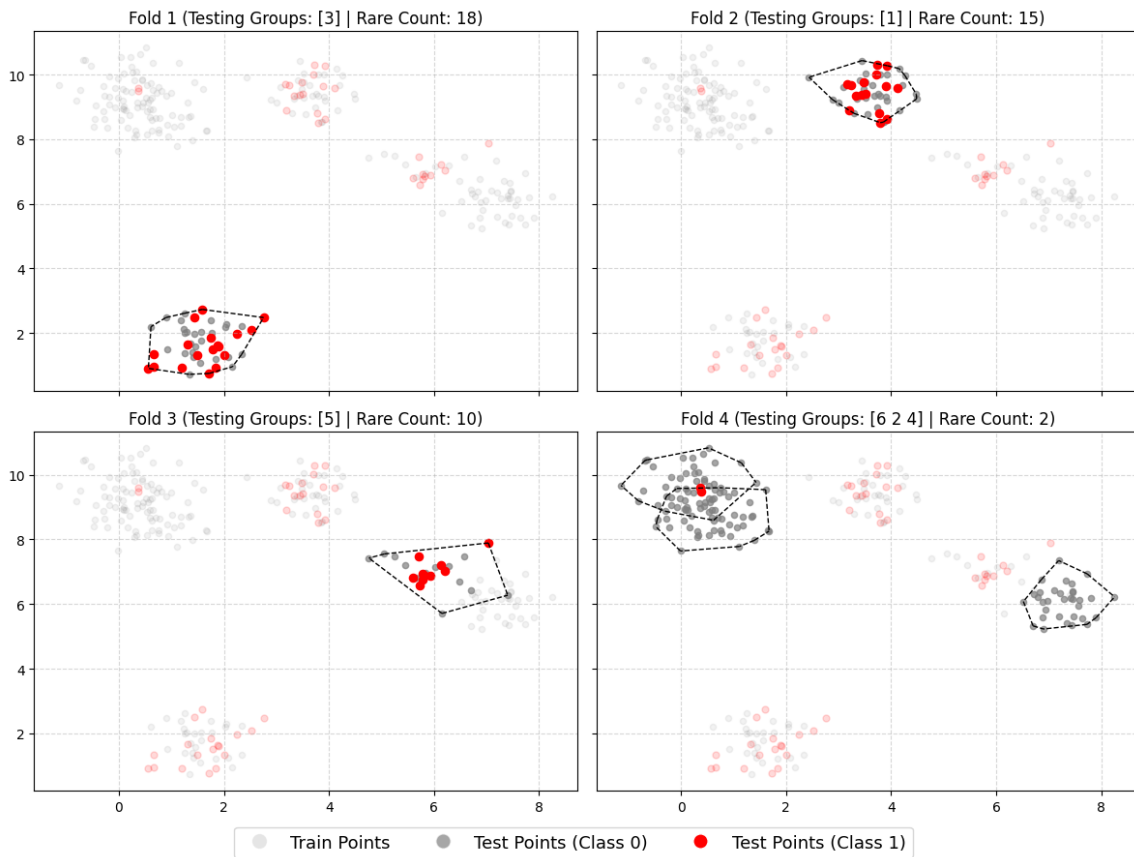

**S2.3h: Stratified Group  $k$ -Fold Cross-Validation (Panel b).** Extended view showing how class proportions are approximately maintained within each fold despite the group constraint.

### Nested Cross-Validation for Grouped Data

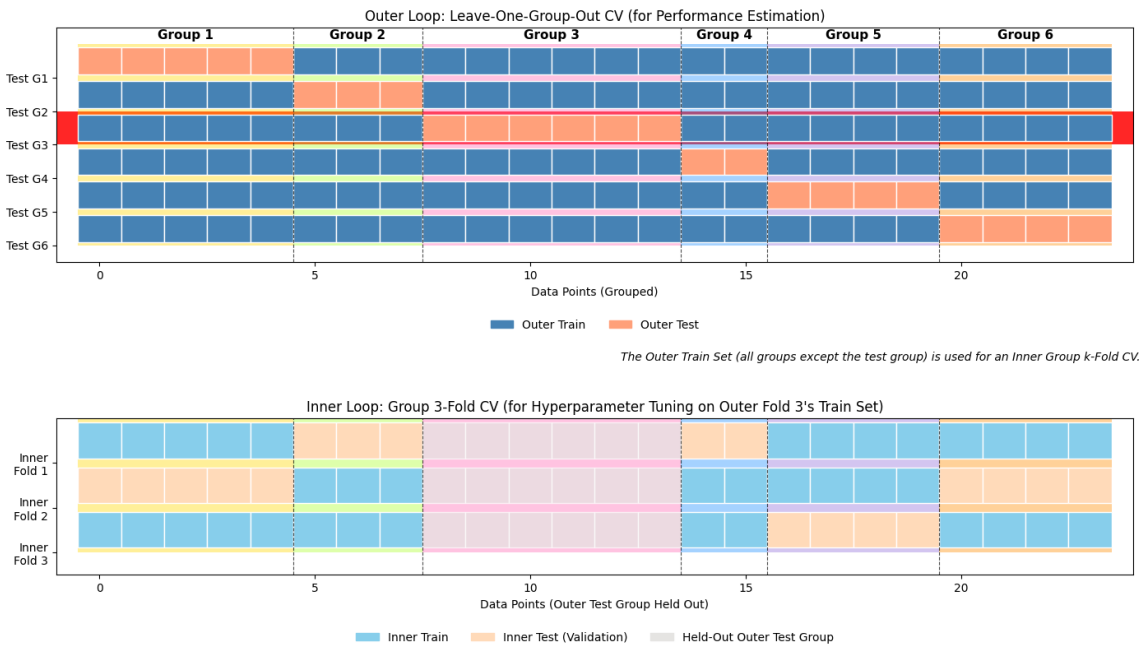

**S2.3i: Nested Cross-Validation for Grouped Data (Panel a).** Combines nested CV with group constraints in both inner and outer loops, preventing both tuning leakage and group leakage simultaneously.

Nested Grouped CV: Inner Loop View (Outer Test Group = 5)

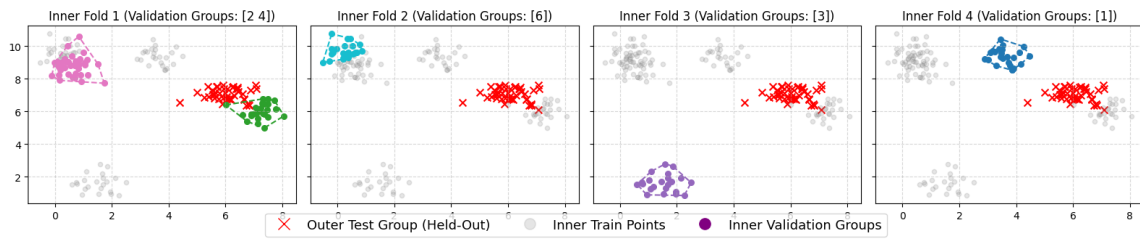

**S2.3j: Nested Cross-Validation for Grouped Data (Panel b).** Inner loop detail showing hyperparameter tuning performed with group-aware splitting within the outer training set.

Nested Grouped CV: Inner Loop View (Outer Test Group = 5)

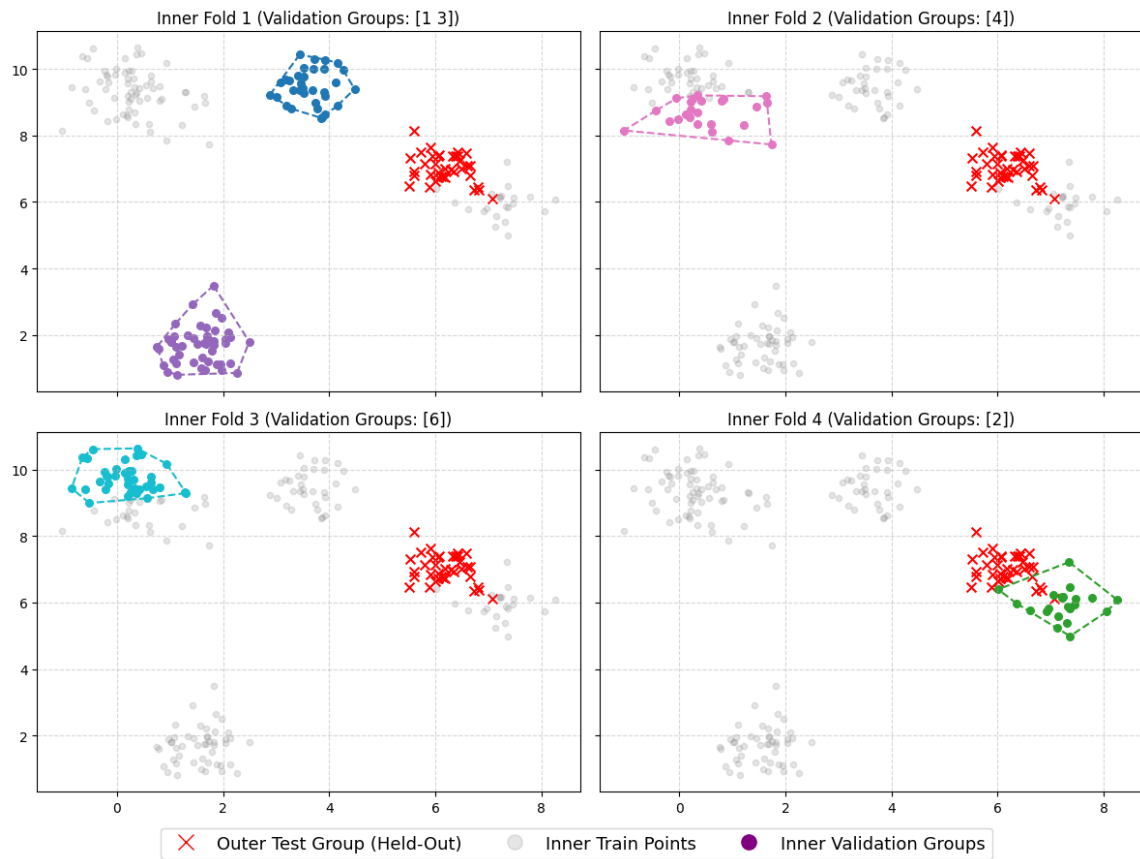

**S2.3k: Nested Cross-Validation for Grouped Data (Panel c).** Summary view of the complete two-loop grouped nested CV structure.

S2.4 Spatial Cross-Validation Methods

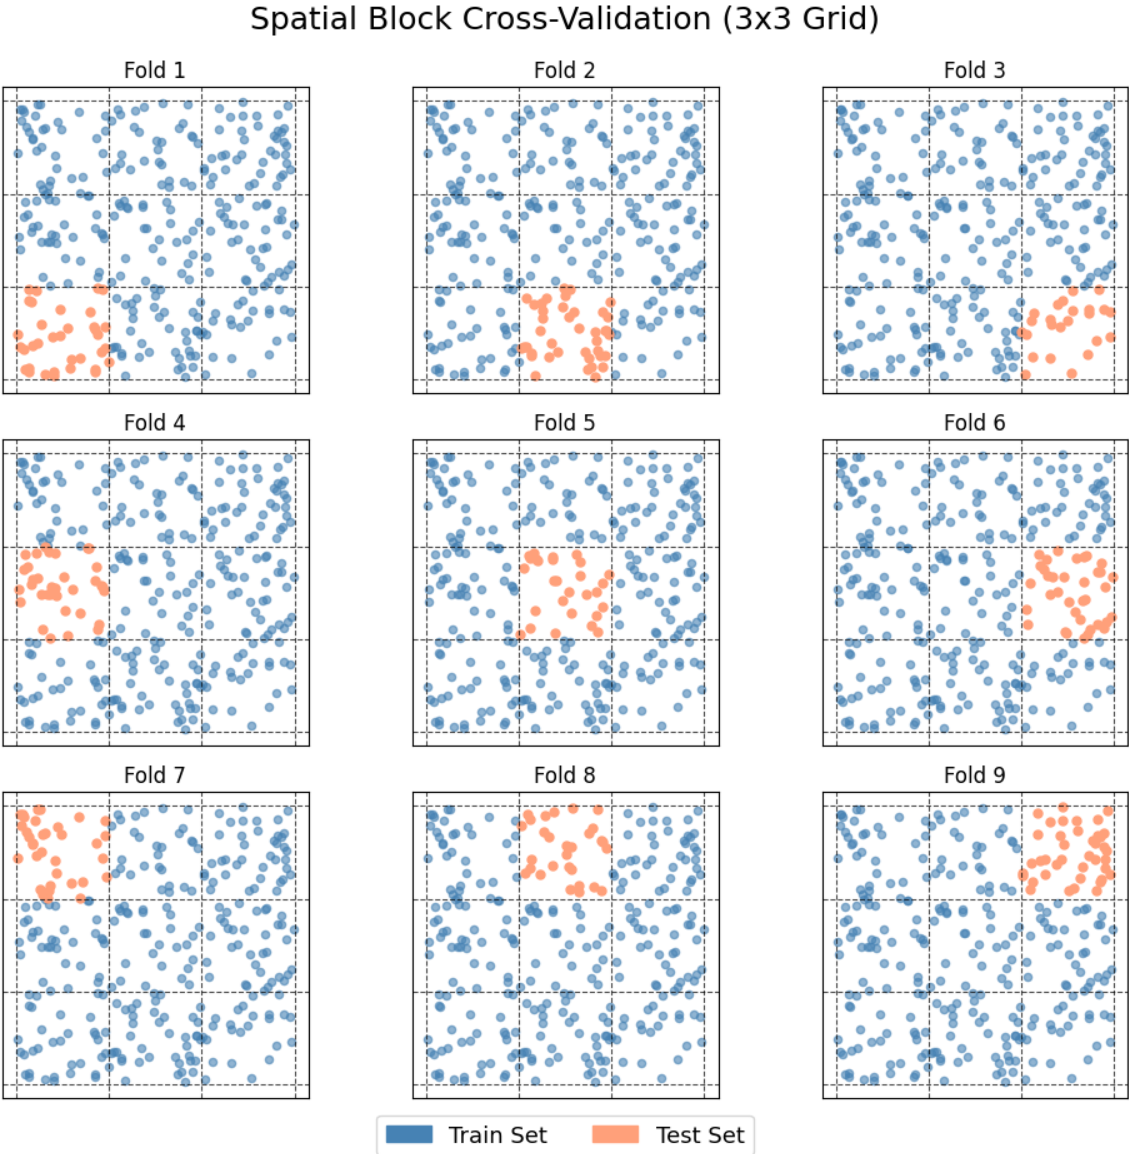

S2.4a: Spatial Block Cross-Validation (Panel a). Geographic space is divided into non-overlapping rectangular or hexagonal blocks. Block size should exceed the spatial autocorrelation range to prevent leakage.

### Buffered Spatial Cross-Validation (3x3 Grid)

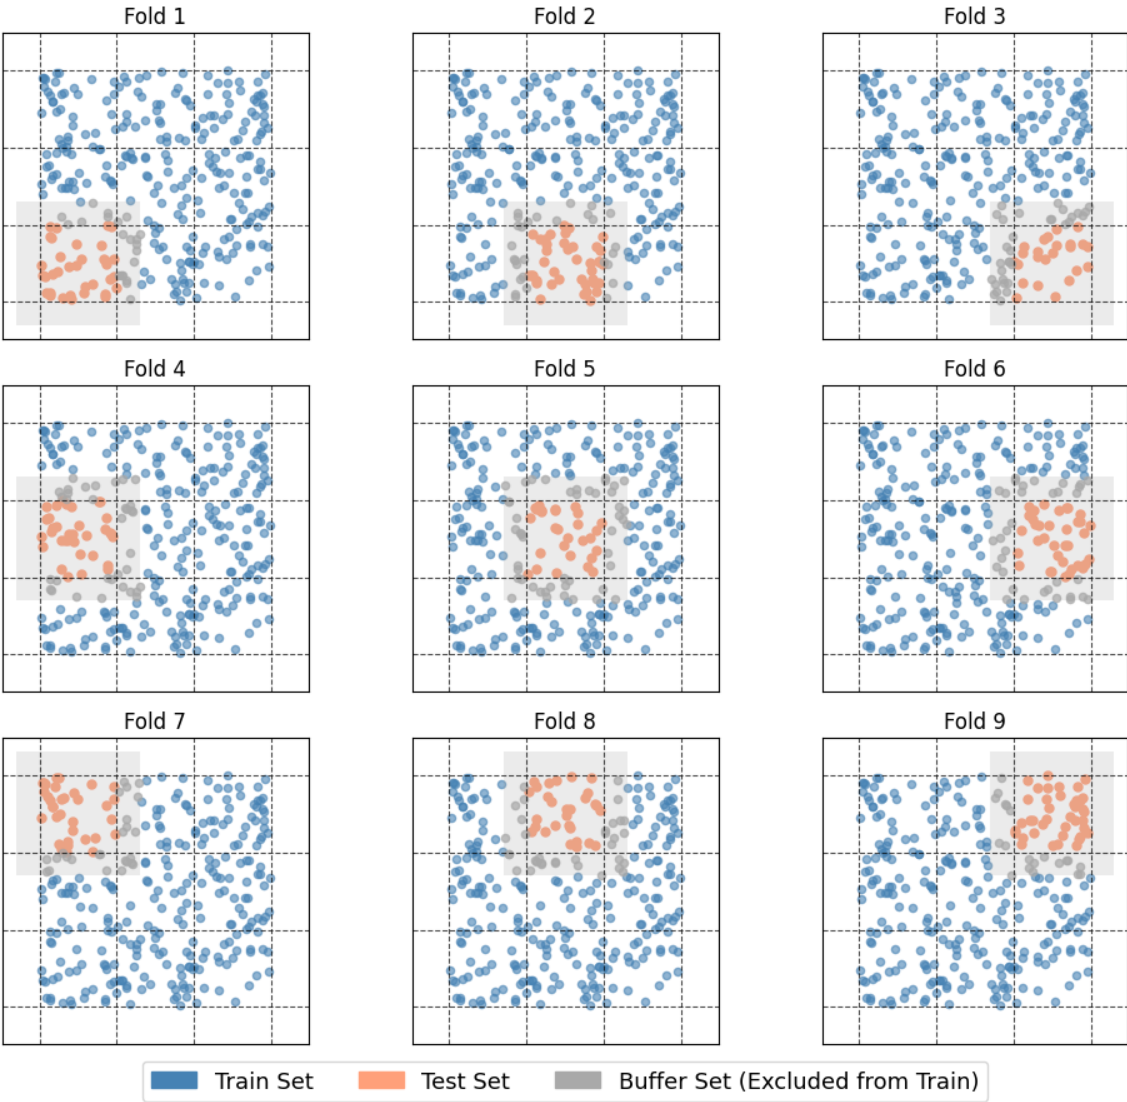

**S2.4b: Buffered Spatial Cross-Validation.** Extends spatial blocking by adding buffer zones around test blocks. Samples within the buffer distance are excluded from training, mitigating leakage from local autocorrelation.

### Spatiotemporal Block CV: 3D Region-Based View

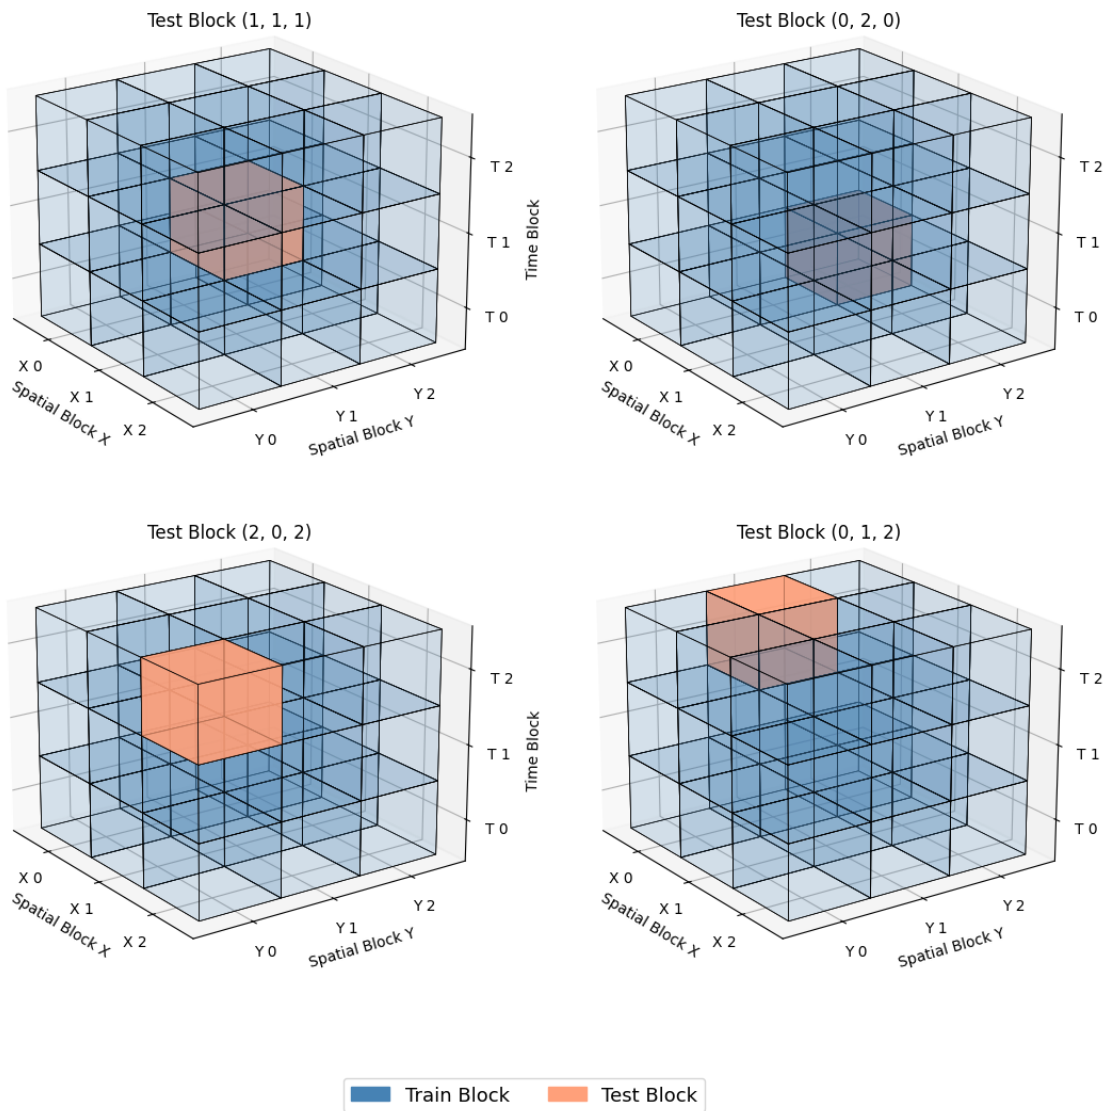

**S2.4c: Spatiotemporal Block Cross-Validation — Without Buffer Exclusion.** Combines spatial blocking with temporal blocking for data exhibiting both spatial and temporal structure.

### Spatiotemporal Block CV: Optimized 2D Space-Time View

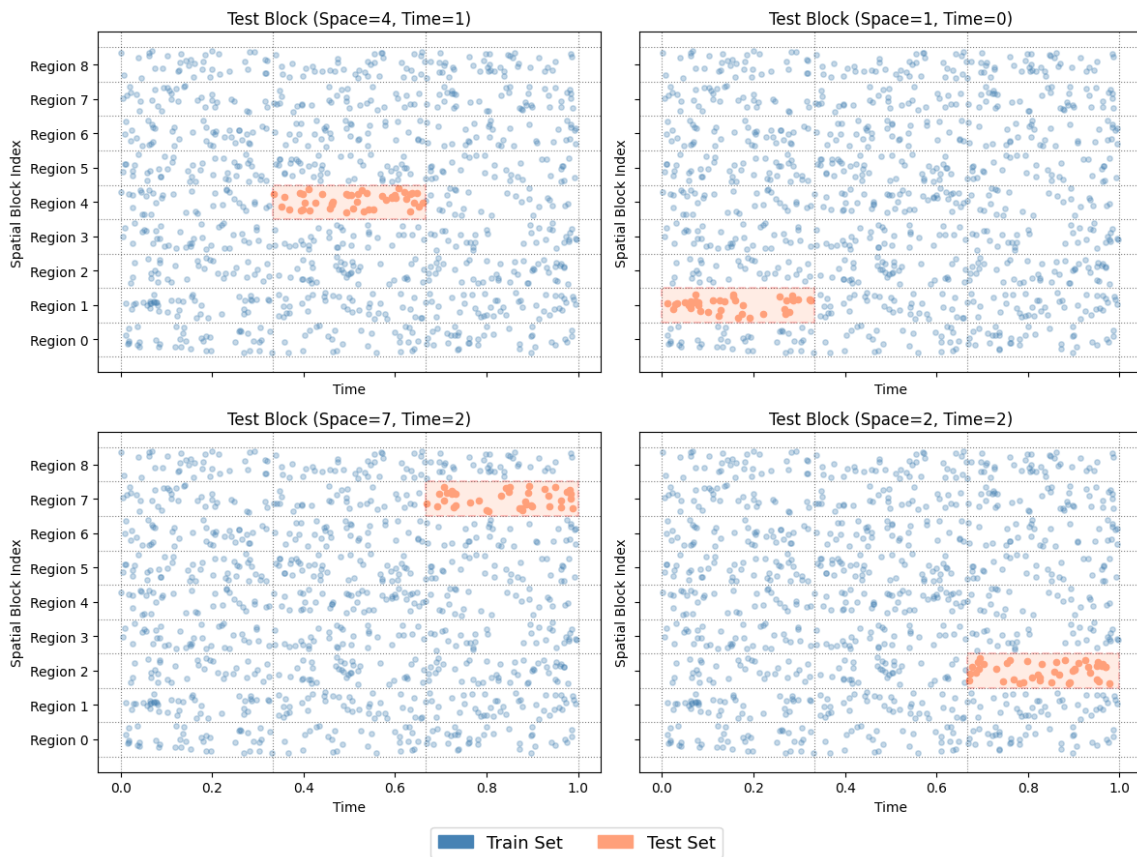

**S2.4d: Spatiotemporal Block Cross-Validation — Detailed View.** Shows spatial and temporal fold assignments overlaid, demonstrating how blocks are defined jointly in space and time.

### Spatiotemporal Block CV: 3-D View with Buffer

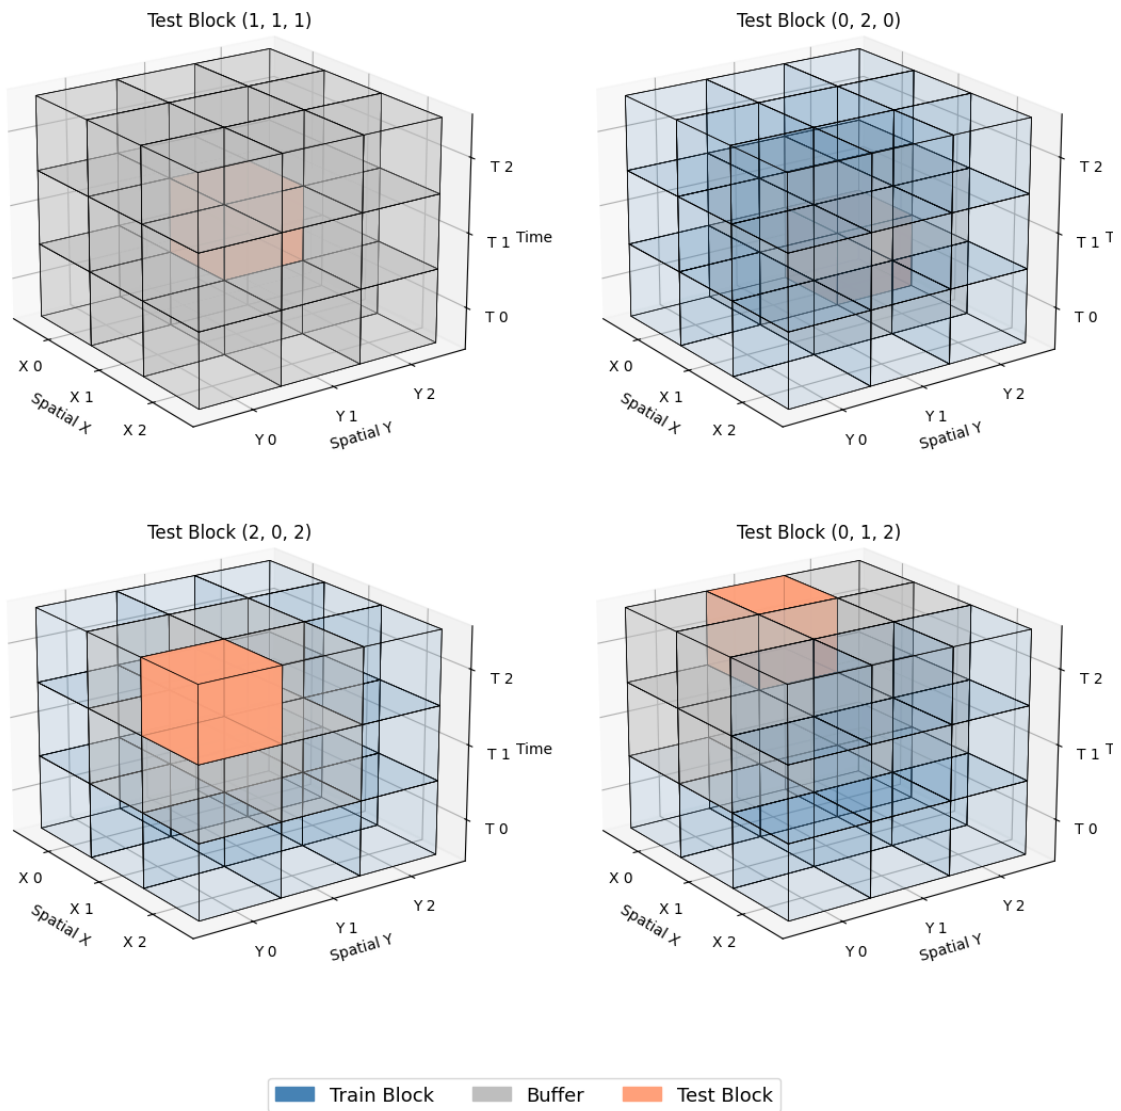

**S2.4e: Spatiotemporal Block Cross-Validation — With Buffer Exclusion (Panel a).** Buffer zones in both spatial and temporal dimensions exclude correlated observations from the training set.

### Spatiotemporal Block CV: 2-D Space-Time View with Buffer (policy=AND, $r_s=1$ , $r_t=1$ )

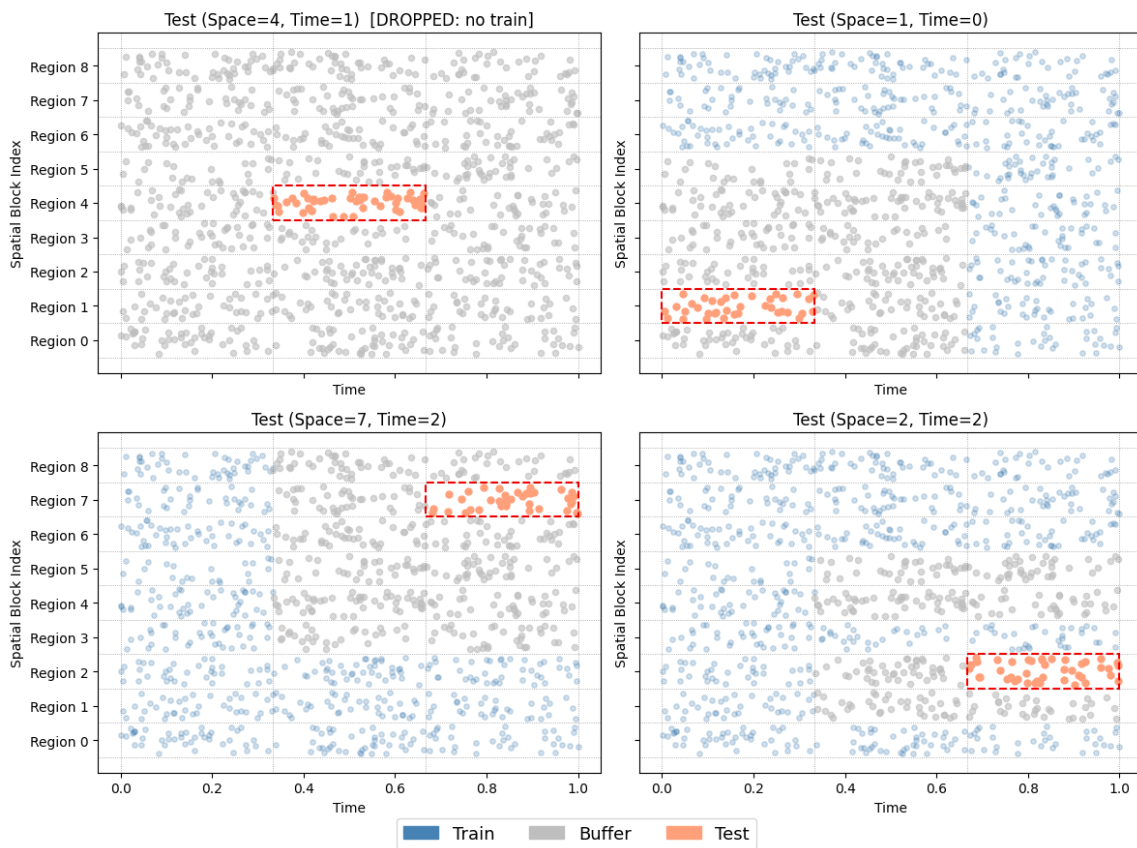

**S2.4f: Spatiotemporal Block Cross-Validation — With Buffer Exclusion (Panel b).** Alternative view showing the effect of buffer radius parameters  $r_s$  and  $r_t$  on training set composition.

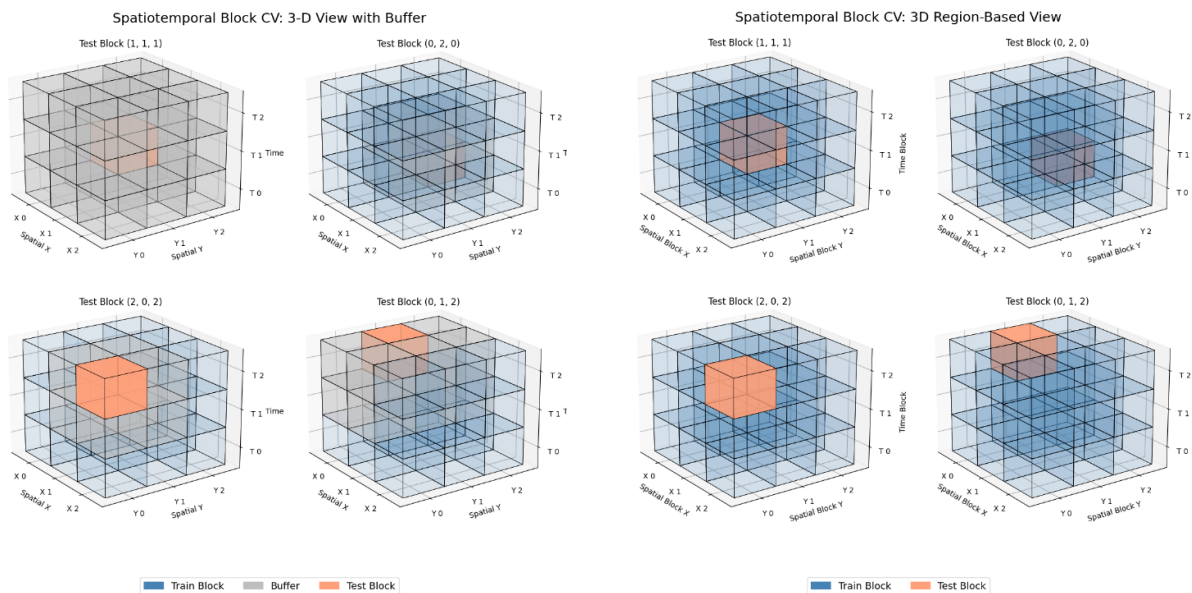

**S2.4g: Spatiotemporal Block Cross-Validation — Side-by-Side Comparison.** Left: without buffer exclusion. Right: with buffer exclusion. The buffer approach produces more conservative but less biased performance estimates by removing spatially and temporally correlated observations from the training set.

## 2.3 Supplementary Figure S4: trustcv Output Examples

The following two panels illustrate representative outputs produced by the `trustcv` toolkit on the Wisconsin Breast Cancer dataset. Panel (a) shows the structured plain-text report generated by `ClinicalMetrics.format_report()`, which is suitable for programmatic inspection and logging. Panel (b) shows the HTML clinical performance report generated by `TrustCVValidator`, which presents the same quantities in a structured layout intended for clinical documentation workflows with FDA GMLP-relevant fields. Both outputs were produced by the minimal example provided in Supplementary Code S6 and are included to give readers a concrete reference for the toolkit's reporting capabilities.

```
In [4]: import numpy as np
        from trustcv.metrics import ClinicalMetrics

        y_true = [1, 0, 1, 1, 0, 0, 1, 0]
        y_pred = [1, 0, 1, 0, 0, 1, 1, 0]

        cm = ClinicalMetrics() # add confidence_level=0.95 if you want CIs
        #cm = ClinicalMetrics(confidence_level=0.95)
        result = cm.calculate_all(y_true, y_pred, None)

        #clin_metrics = ClinicalMetrics(confidence_level=0.95)
        print(cm.format_report(result))
```

---

=====

CLINICAL PERFORMANCE METRICS REPORT

=====

PRIMARY DIAGNOSTIC METRICS

-----

Sensitivity: 75.0% [30.1%, 95.4%]  
 Specificity: 75.0% [30.1%, 95.4%]  
 PPV: 75.0% [30.1%, 95.4%]  
 NPV: 75.0% [30.1%, 95.4%]

PERFORMANCE METRICS

-----

Accuracy: 75.0%  
 Accuracy CI: [40.9%, 92.9%]  
 F1 Score: 0.750

CLINICAL UTILITY

-----

Youden's Index: 0.500  
 LR+: 3.00  
 LR-: 0.33  
 Diagnostic OR: 9.00  
 NNT: n/a  
 NNS: n/a  
 LR+ interpretation: Small increase in post-test probability  
 LR- interpretation: Small decrease in post-test probability  
 Diagnostic OR CI: [0.4, 220.9]

CONFUSION MATRIX

-----

True Positives: 3  
 True Negatives: 3  
 False Positives: 1  
 False Negatives: 1

CLINICAL SIGNIFICANCE

-----

Screening Suitable: No  
 Diagnostic Suitable: No  
 Risk Stratification: No

RECOMMENDATIONS

-----

(a) Structured plain-text output of `ClinicalMetrics.format_report()` for a toy eight-sample example (4 positives, 4 negatives). Sections cover Primary Diagnostic Metrics with 95% bootstrap confidence intervals, Performance Metrics, Clinical Utility (Youden's Index, LR+, LR-, Diagnostic OR), a Confusion Matrix summary, and a Clinical Significance flag table indicating screening/diagnostic suitability. The small sample here yields wide confidence intervals; the same format applied to a full dataset is shown in Panel (b).

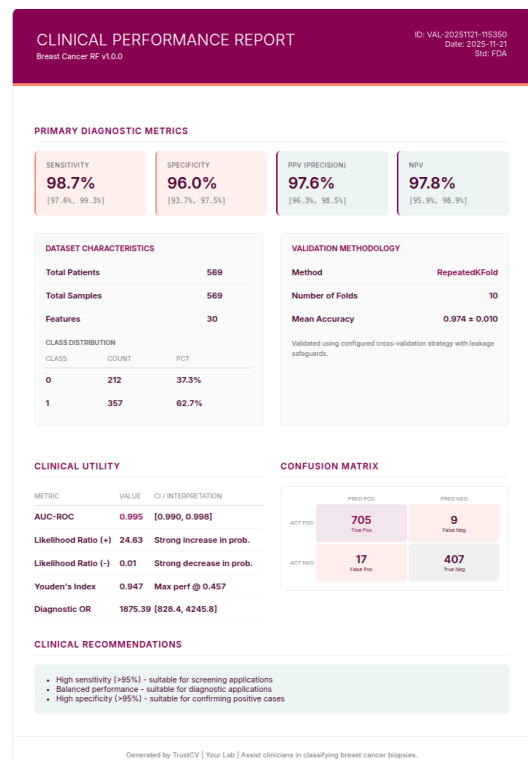

(b) HTML clinical performance report generated by `TrustCVValidator` for a Random Forest model validated on the Wisconsin Breast Cancer dataset (569 samples, 30 features) using Repeated  $k$ -Fold CV (10 folds). The report includes primary diagnostic metrics with 95% confidence intervals (Sensitivity 98.7%, Specificity 96.0%, PPV 97.6%, NPV 97.8%), mean accuracy (0.974 ± 0.010), AUC-ROC (0.995), a confusion matrix aggregated over all held-out folds, and automated clinical recommendations. Header fields reference the validation ID, date, and the applicable regulatory standard (FDA). This report format is generated by the `export_report()` method and is intended for archiving and regulatory documentation.

## 3 Supplementary Code

### Software verification and reproducibility

Implementation correctness was evaluated using an automated unit-test suite covering splitters, leakage checks, end-to-end workflows, and framework integrations. Verification focused on invariants appropriate to each method family, including partition completeness, train–test disjointness, preservation of group exclusivity for grouped methods, maintenance of temporal ordering for temporal methods, and adherence to method-specific parameter behavior. The current test suite comprises 141 test functions across 11 modules and is executed under continuous integration. Example notebooks, annotated scripts, and parameter reference tables were developed alongside the software to support reproducibility and practical uptake.

#### 3.1 Supplementary Code S1: Basic Patient-Grouped Validation

The complete, annotated script is available at:

[https://github.com/ki-smile/trustcv/blob/main/examples/heart\\_disease\\_classification.py](https://github.com/ki-smile/trustcv/blob/main/examples/heart_disease_classification.py)

#### 3.2 Supplementary Code S2: Temporal Validation with Purging

The complete, annotated script is available at:

[https://github.com/ki-smile/trustcv/blob/main/examples/icu\\_patient\\_monitoring.py](https://github.com/ki-smile/trustcv/blob/main/examples/icu_patient_monitoring.py)

#### 3.3 Supplementary Code S3: Deep Learning with MONAI

The complete, annotated script is available at:

[https://github.com/ki-smile/trustcv/blob/main/examples/monai\\_3d\\_imaging\\_cv.py](https://github.com/ki-smile/trustcv/blob/main/examples/monai_3d_imaging_cv.py)

#### 3.4 Supplementary Code S4: Unit Test Example for K-Fold Validation

The complete test module is available at:

[https://github.com/ki-smile/trustcv/blob/main/tests/test\\_iid\\_methods.py](https://github.com/ki-smile/trustcv/blob/main/tests/test_iid_methods.py)

#### 3.5 Supplementary Code S5: Unit Test Example for Leakage Detection

The complete test module is available at:

[https://github.com/ki-smile/trustcv/blob/main/tests/test\\_data\\_leakage.py](https://github.com/ki-smile/trustcv/blob/main/tests/test_data_leakage.py)

## References

- [1] Saeb, S. *et al.* The need to approximate the use-case in clinical machine learning. *GigaScience* **6**, gix019 (2017).
- [2] Little, M. A. *et al.* Using and understanding cross-validation strategies. Perspectives on Saeb et al. *GigaScience* **6**, gix020 (2017).
- [3] Kaufman, S. *et al.* Leakage in data mining: formulation, detection, and avoidance. *ACM Trans Knowl Discov Data* **6**, 1–21 (2012).
- [4] Bergmeir, C., Hyndman, R. J. & Koo, B. A note on the validity of cross-validation for evaluating autoregressive time series prediction. *Comput Stat Data Anal* **120**, 70–83 (2018).
- [5] Roberts, D. R. *et al.* Cross-validation strategies for data with temporal, spatial, hierarchical, or phylogenetic structure. *Ecography* **40**, 913–929 (2017).
- [6] Ploton, P. *et al.* Spatial validation reveals poor predictive performance of large-scale ecological mapping models. *Nat Commun* **11**, 4540 (2020).
- [7] Kapoor, S. & Narayanan, A. Leakage and the reproducibility crisis in machine-learning-based science. *Patterns* **4**, 100804 (2023).
